# Supplementary material
Source: PubMed Central journal article supplement (PMC151416)
Supplement: pnas_0435846100_2.pdf [file pnas_0435846100_2.pdf]

**Table 3. *Pseudomonas aeruginosa* magnesium stress-induced proteins**

| PA#    | Protein name                                             | Gene  | Alt gene  | Function                                     | n  | u-ICAT | Fold induction | SD   | Alt ORF |
|--------|----------------------------------------------------------|-------|-----------|----------------------------------------------|----|--------|----------------|------|---------|
| 8      | glycyl-tRNA synthetase beta chain                        | glyS  |           | Amino acid biosynthesis and metabolism       | 11 | 1      | 2.74           | 0.36 |         |
| 70     | hypothetical protein                                     |       |           | Hypothetical, unclassified, unknown          | 14 | 4      | 1.67           | 0.20 |         |
| 85     | conserved hypothetical protein                           |       |           | Hypothetical, unclassified, unknown          | 12 | 1      | 1.78           | 0.11 |         |
| 100    | hypothetical protein                                     |       |           | Hypothetical, unclassified, unknown          | 1  | 1      | 2.20           | na   |         |
| 126    | hypothetical protein, OMP                                |       |           | Hypothetical, unclassified, unknown          | 2  | 1      | 3.03           | 0.13 |         |
| 302    | polyamine transport protein PotG                         | potG  |           | Transport of small molecules                 | 8  | 1      | 1.68           | 0.22 |         |
| 603**  | probable ATP-binding component of ABC transporter        |       |           | Transport of small molecules                 | 1  | 1      | 2.38           | na   |         |
| 604    | probable binding protein component of ABC transporter    |       |           | Transport of small molecules                 | 2  | 1      | 1.66           | 0.16 |         |
| 704    | probable amidase                                         |       |           | Putative enzymes                             | 1  | 1      | 1.77           | na   |         |
| 858    | conserved hypothetical protein                           |       |           | Hypothetical, unclassified, unknown          | 1  | 1      | 1.94           | na   |         |
| 865    | 4-hydroxyphenylpyruvate dioxygenase                      | hpd   |           | Amino acid biosynthesis and metabolism       | 12 | 1      | 2.12           | 0.24 |         |
| 934    | GTP pyrophosphokinase                                    | relA  |           | Adaptation, protection                       | 2  | 1      | 1.53           | 0.00 |         |
| 996    | probable coenzyme A ligase                               |       |           | Putative enzymes                             | 1  | 1      | 1.57           | na   |         |
| 997    | hypothetical protein                                     |       |           | Hypothetical, unclassified, unknown          | 16 | 2      | 1.57           | 0.26 |         |
| 998    | hypothetical protein                                     |       |           | Putative enzymes                             | 6  | 2      | 2.04           | 0.24 |         |
| 999    | 3-oxoacyl-[acyl-carrier-protein] synthase III            | fabH1 |           | Fatty acid and phospholipid metabolism       | 4  | 1      | 1.63           | 0.13 |         |
| 1091   | hypothetical protein                                     |       |           | Hypothetical, unclassified, unknown          | 1  | 1      | 3.27           | na   |         |
| 1163   | probable glucosyl transferase                            | ndvB  |           | Putative enzymes                             | 1  | 1      | 5.06           | na   |         |
| 1179** | two-component response regulator PhoP                    | phoP  |           | Transcriptional regulators                   | 6  | 1      | 10.34          | 0.96 |         |
| 1262   | probable MFS transporter                                 |       |           | Membrane proteins                            | 1  | 1      | 1.74           | na   |         |
| 1432   | autoinducer synthesis protein LasI                       | lasI  |           | Adaptation, protection                       | 2  | 1      | 3.10           | 0.05 |         |
| 1504   | probable transcriptional regulator                       |       |           | Transcriptional regulators                   | 1  | 1      | 1.82           | na   |         |
| 1520   | probable transcriptional regulator                       |       |           | Transcriptional regulators                   | 4  | 1      | 1.51           | 0.06 |         |
| 1563   | conserved hypothetical protein                           | ygdE  |           | Hypothetical, unclassified, unknown          | 2  | 1      | 3.55           | 0.39 |         |
| 1574   | conserved hypothetical protein                           | yaiE  |           | Hypothetical, unclassified, unknown          | 7  | 1      | 2.06           | 0.22 |         |
| 1579   | hypothetical protein                                     |       |           | Hypothetical, unclassified, unknown          | 5  | 1      | 1.68           | 0.33 |         |
| 1941   | hypothetical protein                                     |       |           | Hypothetical, unclassified, unknown          | 1  | 1      | 6.25           | na   |         |
| 2036   | hypothetical protein                                     |       |           | Hypothetical, unclassified, unknown          | 1  | 1      | 1.71           | na   |         |
| 2040   | probable glutamine synthetase                            |       |           | Putative enzymes                             | 5  | 1      | 2.61           | 0.47 |         |
| 2127** | conserved hypothetical protein                           |       |           | Hypothetical, unclassified, unknown          | 1  | 1      | 2.79           | na   |         |
| 2137   | hypothetical protein                                     |       |           | Hypothetical, unclassified, unknown          | 1  | 1      | 5.00           | na   |         |
| 2343   | xylulose kinase                                          | mtlY  |           | Carbon compound catabolism                   | 1  | 1      | 2.44           | na   |         |
| 2400   | probable non-ribosomal peptide synthetase                |       |           | Adaptation, protection                       | 11 | 2      | 3.29           | 0.55 | 2402    |
| 2405   | hypothetical protein                                     |       |           | Hypothetical, unclassified, unknown          | 2  | 1      | 2.59           | 0.14 |         |
| 2491   | probable oxidoreductase                                  |       |           | Putative enzymes                             | 9  | 1      | 1.54           | 0.08 |         |
| 2540   | conserved hypothetical protein                           |       |           | Hypothetical, unclassified, unknown          | 3  | 1      | 2.69           | 0.18 |         |
| 2641   | NADH dehydrogenase I chain F                             | nuoF  |           | Energy metabolism                            | 2  | 1      | 1.50           | 0.01 |         |
| 2735   | probable restriction-modification system protein         |       |           | Putative enzymes                             | 1  | 1      | 7.27           | na   |         |
| 2789   | hypothetical protein                                     |       |           | Hypothetical, unclassified, unknown          | 1  | 1      | 2.50           | na   |         |
| 2953   | electron transfer flavoprotein-ubiquinone oxidoreductase |       |           | Energy metabolism                            | 9  | 4      | 1.66           | 0.13 |         |
| 2968   | malonyl-CoA-[acyl-carrier-protein] transacylase          | fabD  |           | Fatty acid and phospholipid metabolism       | 1  | 1      | 1.81           | na   |         |
| 3179   | conserved hypothetical protein                           | tmNRP | yciL      | Hypothetical, unclassified, unknown          | 2  | 1      | 2.54           | 0.20 |         |
| 3193   | glucokinase                                              | glk   |           | Carbon compound catabolism                   | 1  | 1      | 1.63           | na   |         |
| 3284   | hypothetical protein                                     |       |           | Hypothetical, unclassified, unknown          | 3  | 1      | 2.99           | 0.96 |         |
| 3327   | probable non-ribosomal peptide synthetase                |       |           | Adaptation, protection                       | 2  | 1      | 1.55           | 0.00 |         |
| 3330   | probable short chain dehydrogenase                       |       |           | Putative enzymes                             | 5  | 1      | 1.86           | 0.08 |         |
| 3481   | conserved hypothetical protein                           | mrp   |           | Hypothetical, unclassified, unknown          | 5  | 1      | 1.82           | 0.04 |         |
| 3504   | probable aldehyde dehydrogenase                          |       |           | Putative enzymes                             | 3  | 1      | 1.68           | 0.02 |         |
| 3531   | bacterioferritin                                         | bfrB  |           | Transport of small molecules                 | 3  | 1      | 1.59           | 0.14 |         |
| 3533   | conserved hypothetical protein                           | ydhD  |           | Hypothetical, unclassified, unknown          | 10 | 1      | 1.65           | 0.15 |         |
| 3552** | conserved hypothetical protein                           |       |           | Hypothetical, unclassified, unknown          | 7  | 1      | 2.84           | 0.25 |         |
| 3553   | probable glycosyl transferase                            | pmrF  |           | Adaptation, protection; Putative enzymes     | 1  | 1      | 2.33           | na   |         |
| 3554   | conserved hypothetical protein                           |       |           | Putative enzymes                             | 34 | 7      | 6.09           | 1.16 |         |
| 3578   | conserved hypothetical protein                           |       |           | Hypothetical, unclassified, unknown          | 1  | 1      | 2.21           | na   |         |
| 3619   | hypothetical protein                                     |       |           | Hypothetical, unclassified, unknown          | 1  | 1      | 3.14           | na   |         |
| 3655   | elongation factor Ts                                     | tsf   |           | Translation, post-translational modification | 4  | 1      | 2.20           | 0.38 |         |
| 3666   | tetrahydrodipicolinate succinylase                       | dapD  |           | Cell wall / LPS / capsule                    | 1  | 1      | 2.10           | na   |         |
| 3716   | hypothetical protein                                     |       |           | Hypothetical, unclassified, unknown          | 5  | 1      | 2.00           | 0.17 |         |
| 3735   | threonine synthase                                       | thrC  |           | Amino acid biosynthesis and metabolism       | 1  | 1      | 2.71           | na   |         |
| 3736   | homoserine dehydrogenase                                 | hom   |           | Amino acid biosynthesis and metabolism       | 1  | 1      | 1.66           | na   |         |
| 3925   | probable acyl-CoA thiolase                               |       |           | Putative enzymes                             | 6  | 1      | 2.91           | 1.22 |         |
| 4005   | conserved hypothetical protein                           |       |           | Hypothetical, unclassified, unknown          | 2  | 1      | 1.83           | 0.24 |         |
| 4031   | inorganic pyrophosphatase                                | ppa   | ipyR      | Central intermediary metabolism              | 6  | 1      | 2.24           | 0.46 |         |
| 4074   | probable transcriptional regulator                       |       |           | Transcriptional regulators                   | 1  | 1      | 7.79           | na   |         |
| 4284   | exodeoxyribonuclease V beta chain                        | recB  |           | DNA metabolism                               | 1  | 1      | 2.91           | na   |         |
| 4456   | probable ATP-binding component of ABC transporter        |       |           | Transport of small molecules                 | 3  | 2      | 3.15           | 0.32 |         |
| 4457   | conserved hypothetical protein                           | yrbF  |           | Secreted Factors (toxins, enzymes, alginate) | 3  | 1      | 1.82           | 0.15 |         |
| 4481   | rod shape-determining protein MreB                       | mreB  | envB rodY | Cell division; Cell wall / LPS / capsule     | 3  | 2      | 1.88           | 0.33 |         |
| 4635** | conserved hypothetical protein                           |       |           | Hypothetical, unclassified, unknown          | 13 | 1      | 3.99           | 0.56 |         |
| 4656   | conserved hypothetical protein                           |       |           | Hypothetical, unclassified, unknown          | 3  | 1      | 2.26           | 0.45 |         |
| 4774   | hypothetical protein                                     |       |           | Hypothetical, unclassified, unknown          | 2  | 1      | 3.48           | 0.19 |         |
| 4824** | hypothetical protein                                     |       |           | Hypothetical, unclassified, unknown          | 4  | 2      | 4.17           | 0.14 |         |
| 4825** | Mg(2+) transport ATPase, P-type 2                        | mgtA  |           | Transport of small molecules                 | 85 | 3      | 5.80           | 1.75 |         |
| 4935   | 30S ribosomal protein S6                                 | rpsF  |           | Translation, post-translational modification | 12 | 1      | 1.74           | 0.20 |         |
| 5108   | hypothetical protein, OMP                                |       |           | Hypothetical, unclassified, unknown          | 1  | 1      | 1.64           | na   |         |
| 5143   | imidazoleglycerol-phosphate dehydratase                  | hisB  |           | Amino acid biosynthesis and metabolism       | 3  | 1      | 1.61           | 0.11 |         |

PA#, *P. aeruginosa* gene number; alt gene, alternative gene name; *n*, number of independent identifications and quantification events for each protein; u-ICAT, number of unique peptide sequences; fold induction, average ratios of all quantified peptides for each protein; na, not applicable; alt ORF, identified peptides are identical in both ORFs.

\*\*Corresponding genes were also shown to be induced by transcriptional profiling analysis (R. K. Ernst and S.I.M., unpublished results). Values >1.5 represent increased relative abundance on growth in low magnesium. For proteins that were quantified by ICAT analysis of both the whole cell and the membrane fraction, results of the whole cell protein analysis were defined as the accurate abundance ratio for a given protein.
