# Supplementary material
Source: PubMed Central journal article supplement (PMC151416)
Supplement: pnas_0435846100_3.pdf [file pnas_0435846100_3.pdf]

**Table 4. *P. aeruginosa* magnesium stress-repressed proteins**

| PA#    | Protein name                                               | Gene      | Alt gene  | Function                                       | n  | u-ICAT | Fold repression | SD   | Alt ORF |
|--------|------------------------------------------------------------|-----------|-----------|------------------------------------------------|----|--------|-----------------|------|---------|
| 35     | tryptophan synthase alpha chain                            | trpA      |           | Amino acid biosynthesis and metabolism         | 1  | 1      | 1.76            | na   |         |
| 39     | hypothetical protein                                       |           |           | Hypothetical, unclassified, unknown            | 38 | 1      | 2.08            | 0.20 |         |
| 122**  | conserved hypothetical protein                             |           |           | Hypothetical, unclassified, unknown            | 6  | 2      | 2.40            | 0.19 |         |
| 364    | probable oxidoreductase                                    |           |           | Putative enzymes                               | 1  | 1      | 3.91            | na   |         |
| 399    | cystathionine beta-synthase                                |           |           | Amino acid biosynthesis and metabolism         | 6  | 1      | 2.14            | 0.13 |         |
| 400    | probable cystathionine gamma-lyase                         | metB metC |           | Amino acid biosynthesis and metabolism         | 12 | 1      | 1.74            | 0.08 |         |
| 407    | glutathione synthetase                                     | gshB      |           | Amino acid biosynthesis and metabolism         | 1  | 1      | 1.76            | na   |         |
| 408    | twitching motility protein PilG                            | pilG      |           | Chemotaxis; Motility & Attachment              | 1  | 1      | 2.26            | na   |         |
| 430    | 5,10-methylenetetrahydrofolate reductase                   | metF      |           | Central intermediary metabolism                | 10 | 2      | 1.56            | 0.12 |         |
| 432    | S-adenosyl-L-homocysteine hydrolase                        | sahH      | ahcY      | Amino acid biosynthesis and metabolism         | 5  | 1      | 1.54            | 0.03 |         |
| 554    | hypothetical protein                                       |           |           | Hypothetical, unclassified, unknown            | 1  | 1      | 2.39            | na   |         |
| 588**  | conserved hypothetical protein                             | yeaG      |           | Hypothetical, unclassified, unknown            | 27 | 5      | 1.56            | 0.16 |         |
| 744**  | probable enoyl-CoA hydratase/isomerase                     |           |           | Putative enzymes                               | 21 | 3      | 1.69            | 0.17 |         |
| 745    | probable enoyl-CoA hydratase/isomerase                     |           |           | Putative enzymes                               | 5  | 2      | 1.81            | 0.06 |         |
| 746**  | probable acyl-CoA dehydrogenase                            |           |           | Putative enzymes                               | 7  | 3      | 1.83            | 0.14 |         |
| 792    | propionate catabolic protein PrpD                          | prpD      |           | Carbon compound catabolism                     | 43 | 4      | 2.00            | 0.13 |         |
| 888    | arginine/ornithine binding protein AotJ                    | aotJ      |           | Transport of small molecules                   | 1  | 1      | 2.00            | na   |         |
| 1049   | pyridoxine 5'-phosphate oxidase                            | pdxH      |           | Biosynthesis of cofactors                      | 2  | 1      | 1.54            | 0.13 |         |
| 1155   | ribonucleoside reductase, small chain                      | nrdB      |           | Nucleotide biosynthesis and metabolism         | 6  | 1      | 1.81            | 0.06 |         |
| 1238   | probable outer membrane component of multidrug efflux pump | opmJ      |           | Transport of small molecules                   | 1  | 1      | 1.91            | na   |         |
| 1484   | probable transcriptional regulator                         |           |           | Transcriptional regulators                     | 1  | 1      | 1.65            | na   |         |
| 1529   | DNA ligase                                                 | lig       | dnaL ligA | DNA metabolism                                 | 1  | 1      | 1.79            | na   |         |
| 1803   | Lon protease                                               | lon       |           | Translation, degradation                       | 1  | 1      | 3.44            | na   |         |
| 1899** | probable phenazine biosynthesis protein                    | phzA2     |           | Secreted Factors (toxins, enzymes, alginate)   | 2  | 2      | 2.69            | 0.00 | 4210    |
| 1900   | probable phenazine biosynthesis protein                    | phzB2     |           | Secreted Factors (toxins, enzymes, alginate)   | 8  | 2      | 1.70            | 0.10 |         |
| 1903** | phenazine biosynthesis protein PhzE                        | phzE2     |           | Secreted Factors (toxins, enzymes, alginate)   | 1  | 1      | 2.70            | na   | 4214    |
| 1904** | probable phenazine biosynthesis protein                    | phzF2     |           | Secreted Factors (toxins, enzymes, alginate)   | 2  | 1      | 1.85            | 0.01 | 4215    |
| 2222   | hypothetical protein                                       |           |           | Hypothetical, unclassified, unknown            | 1  | 1      | 12.29           | na   |         |
| 2290   | glucose dehydrogenase                                      | gcd       |           | Carbon compound catabolism                     | 8  | 2      | 2.09            | 0.16 |         |
| 2367   | hypothetical protein                                       |           |           | Hypothetical, unclassified, unknown            | 4  | 1      | 3.34            | 0.18 |         |
| 2394   | probable aminotransferase                                  |           |           | Putative enzymes                               | 2  | 1      | 2.32            | 0.36 |         |
| 2395** | hypothetical protein                                       |           |           | Hypothetical, unclassified, unknown            | 4  | 1      | 3.04            | 0.20 |         |
| 2413** | probable class III aminotransferase                        |           |           | Putative enzymes                               | 93 | 3      | 1.92            | 0.25 |         |
| 2424   | probable non-ribosomal peptide synthetase                  |           |           | Adaptation, protection                         | 90 | 7      | 1.56            | 0.14 |         |
| 2764   | hypothetical protein                                       |           |           | Hypothetical, unclassified, unknown            | 1  | 1      | 2.05            | na   |         |
| 3083   | aminopeptidase N                                           | pepN      |           | Translation, post-translational modification   | 3  | 1      | 2.10            | 0.15 |         |
| 3120   | 3-isopropylmalate dehydratase small subunit                |           |           | Amino acid biosynthesis and metabolism         | 1  | 1      | 3.58            | na   |         |
| 3331   | cytochrome P450                                            |           |           | Carbon compound catabolism                     | 5  | 1      | 2.00            | 0.08 |         |
| 3348   | probable chemotaxis protein methyltransferase              | cheR1     |           | Adaptation, protection; Chemotaxis             | 4  | 1      | 1.67            | 0.21 |         |
| 3478** | rhamnosyltransferase chain B                               | rhIB      |           | Secreted Factors (toxins, enzymes, alginate)   | 4  | 1      | 1.57            | 0.15 |         |
| 3569   | 3-hydroxyisobutyrate dehydrogenase                         | mmsB      |           | Carbon compound catabolism                     | 16 | 1      | 2.07            | 0.04 |         |
| 3570** | methylmalonate-semialdehyde dehydrogenase                  | mmsA      |           | Amino acid biosynthesis and metabolism         | 4  | 1      | 2.15            | 0.12 |         |
| 3751   | phosphoribosylglycinamide formyltransferase 2              | purT      |           | Amino acid biosynthesis and metabolism         | 1  | 1      | 1.62            | na   |         |
| 3792   | 2-isopropylmalate synthase                                 | leuA      |           | Amino acid biosynthesis and metabolism         | 9  | 2      | 2.76            | 0.30 |         |
| 4025   | probable ethanolamine ammonia-lyase light chain            | eutC      |           | Carbon compound catabolism                     | 1  | 1      | 1.72            | na   |         |
| 4211   | probable phenazine biosynthesis protein                    | phzB1     |           | Secreted Factors (toxins, enzymes, alginate)   | 2  | 1      | 1.93            | 0.07 |         |
| 4224   | hypothetical protein                                       | pchG      |           | Hypothetical, unclassified, unknown            | 21 | 2      | 5.23            | 0.25 |         |
| 4225** | pyochelin synthetase                                       | pchF      |           | Transport of small molecules; Secreted Factors | 4  | 3      | 1.97            | 0.14 |         |
| 4226** | dihydroaeruginic acid synthetase                           | pchE      |           | Transport of small molecules; Secreted Factors | 15 | 3      | 4.23            | 0.19 |         |
| 4228** | pyochelin biosynthesis protein PchD                        | pchD      |           | Transport of small molecules; Secreted Factors | 30 | 5      | 4.07            | 0.19 |         |
| 4230** | salicylate biosynthesis protein PchB                       | pchB      |           | Transport of small molecules; Secreted Factors | 17 | 2      | 4.42            | 0.36 |         |
| 4231** | salicylate biosynthesis isochorismate synthase             | pchA      |           | Secreted Factors (toxins, enzymes, alginate)   | 1  | 1      | 2.21            | na   |         |
| 4385   | GroEL protein                                              | groEL     | mopA      | Chaperones & heat shock proteins               | 3  | 1      | 3.07            | 0.21 |         |
| 4464   | nitrogen regulatory IIA protein                            | ptsN      |           | Transport of small molecules                   | 2  | 1      | 1.58            | 0.12 |         |
| 4579   | hypothetical protein                                       |           |           | Hypothetical, unclassified, unknown            | 1  | 1      | 1.69            | na   |         |
| 4588   | glutamate dehydrogenase                                    | gdhA      |           | Amino acid biosynthesis and metabolism         | 1  | 1      | 1.87            | na   |         |
| 4607   | hypothetical protein                                       |           |           | Hypothetical, unclassified, unknown            | 16 | 1      | 2.10            | 0.16 |         |
| 4715   | probable aminotransferase                                  | yfdZ      |           | Putative enzymes                               | 3  | 1      | 1.77            | 0.10 |         |
| 4847** | biotin carboxyl carrier protein (BCCP)                     | accB      | fabE      | Fatty acid and phospholipid metabolism         | 11 | 1      | 2.30            | 0.09 |         |
| 4876   | osmotically inducible lipoprotein OsmE                     | osmE      | osmE      | Membrane proteins; Adaptation, protection      | 7  | 2      | 1.52            | 0.18 |         |
| 4988   | 3-deoxy-D-manno-octulosonic-acid (KDO) transferase         | waaA      | kdtA      | Cell wall / LPS / capsule                      | 1  | 1      | 4.55            | na   |         |
| 5091   | N-formylglutamate amidohydrolase                           | hutG      |           | Amino acid biosynthesis and metabolism         | 4  | 1      | 2.16            | 0.15 |         |
| 5092   | imidazolone-5-propionate hydrolase HutI                    | hutI      |           | Amino acid biosynthesis and metabolism         | 1  | 1      | 1.83            | na   |         |
| 5291   | probable choline transporter                               |           | bet2      | Transport of small molecules                   | 1  | 1      | 1.65            | na   |         |
| 5316   | 50S ribosomal protein L28                                  | rpmB      |           | Translation, post-translational modification   | 12 | 1      | 1.81            | 0.14 |         |
| 5323   | acetylglutamate kinase                                     | argB      |           | Amino acid biosynthesis and metabolism         | 2  | 1      | 1.54            | 0.09 |         |
| 5355   | glycolate oxidase subunit GlcD                             | glcD      |           | Central intermediary metabolism                | 1  | 1      | 1.72            | na   |         |
| 5359   | hypothetical protein                                       |           |           | Hypothetical, unclassified, unknown            | 9  | 1      | 1.87            | 0.08 |         |
| 5436   | probable biotin carboxylase subunit of a transcarboxylase  |           |           | Central intermediary metabolism                | 1  | 1      | 2.50            | na   |         |

PA#, *P. aeruginosa* gene number; alt gene, alternative gene name; n, number of independent identifications and quantification events for each protein; u-ICAT, number of unique peptide sequences; fold repression, average ratios of all quantified peptides for each protein; na, not applicable; alt ORF, identified peptides are identical in both ORFs.

\*\* Authors contributing equally were arranged alphabetically, per PNAS style. Corresponding genes were also shown to be repressed by transcriptional profiling analysis (R. K. Ernst and S.I.M., unpublished results). Values >1.5 represent decreased relative abundance on growth in low magnesium. For proteins that were quantified by ICAT analysis of both the whole cell and the membrane fraction, results of the whole cell protein analysis were defined as the accurate abundance ratio for a given protein.
