# Supplementary material
Source: PubMed Central journal article supplement (PMC151416)
Supplement: pnas_0435846100_4.pdf [file pnas_0435846100_4.pdf]

**Table 5. Results of *P. aeruginosa* whole cell ICAT analysis**

| PA#  | Protein name                                                          | Gene  | Alt gene  | Function                                      | n   | u-ICAT | Fold induction | SD   | Alt ORF |
|------|-----------------------------------------------------------------------|-------|-----------|-----------------------------------------------|-----|--------|----------------|------|---------|
| 1179 | two-component response regulator PhoP                                 | phoP  |           | Transcriptional regulators                    | 6   | 1      | 10.34          | 0.96 |         |
| 4074 | probable transcriptional regulator                                    |       |           | Transcriptional regulators                    | 1   | 1      | 7.79           | na   |         |
| 2735 | probable restriction-modification system protein                      |       |           | Putative enzymes                              | 1   | 1      | 7.27           | na   |         |
| 3554 | conserved hypothetical protein                                        |       |           | Putative enzymes                              | 34  | 7      | 6.09           | 1.16 |         |
| 4825 | Mg(2+) transport ATPase, P-type 2                                     | mgtA  |           | Transport of small molecules                  | 85  | 3      | 5.80           | 1.75 |         |
| 1163 | probable glucosyl transferase                                         |       |           | Putative enzymes                              | 1   | 1      | 5.06           | na   |         |
| 4635 | conserved hypothetical protein                                        | ndvB  |           | Hypothetical, unclassified, unknown           | 13  | 1      | 3.99           | 0.56 |         |
| 1563 | conserved hypothetical protein                                        | mgtC  |           | Hypothetical, unclassified, unknown           | 2   | 1      | 3.55           | 0.39 |         |
| 4774 | hypothetical protein                                                  | ygdE  |           | Hypothetical, unclassified, unknown           | 2   | 1      | 3.48           | 0.19 |         |
| 2400 | probable non-ribosomal peptide synthetase                             |       |           | Adaptation, protection                        | 11  | 2      | 3.29           | 0.55 | 2402    |
| 1091 | hypothetical protein                                                  |       |           | Hypothetical, unclassified, unknown           | 1   | 1      | 3.27           | na   |         |
| 3619 | hypothetical protein                                                  |       |           | Hypothetical, unclassified, unknown           | 1   | 1      | 3.14           | na   |         |
| 1432 | autoinducer synthesis protein LasI                                    | lasI  |           | Adaptation, protection                        | 2   | 1      | 3.10           | 0.05 |         |
| 3284 | hypothetical protein                                                  |       |           | Hypothetical, unclassified, unknown           | 3   | 1      | 2.99           | 0.96 |         |
| 4284 | exodeoxyribonuclease V beta chain                                     | recB  | rorA      | DNA replication, recombination, modification  | 1   | 1      | 2.91           | na   |         |
| 3925 | probable acyl-CoA thiolase                                            |       |           | Putative enzymes                              | 6   | 1      | 2.91           | 1.22 |         |
| 3552 | conserved hypothetical protein                                        |       |           | Hypothetical, unclassified, unknown           | 7   | 1      | 2.84           | 0.25 |         |
| 2127 | conserved hypothetical protein                                        |       |           | Hypothetical, unclassified, unknown           | 1   | 1      | 2.79           | na   |         |
| 8    | glycyl-tRNA synthetase beta chain                                     | glyS  |           | Amino acid biosynthesis and metabolism        | 11  | 1      | 2.74           | 0.36 |         |
| 3735 | threonine synthase                                                    | thrC  |           | Amino acid biosynthesis and metabolism        | 1   | 1      | 2.71           | na   |         |
| 2040 | probable glutamine synthetase                                         |       |           | Putative enzymes                              | 5   | 1      | 2.61           | 0.47 |         |
| 2405 | hypothetical protein                                                  |       |           | Hypothetical, unclassified, unknown           | 2   | 1      | 2.59           | 0.14 |         |
| 3179 | conserved hypothetical protein                                        |       | yciL      | Hypothetical, unclassified, unknown           | 2   | 1      | 2.54           | 0.20 |         |
| 2343 | xylulose kinase                                                       | mtlY  |           | Carbon compound catabolism                    | 1   | 1      | 2.44           | na   |         |
| 3553 | probable glycosyl transferase                                         |       | pmrF      | Adaptation, protection; Putative enzymes      | 1   | 1      | 2.33           | na   |         |
| 4031 | inorganic pyrophosphatase                                             | ppa   | ipyR      | Central intermediary metabolism               | 6   | 1      | 2.24           | 0.46 |         |
| 3578 | conserved hypothetical protein                                        |       |           | Hypothetical, unclassified, unknown           | 1   | 1      | 2.21           | na   |         |
| 100  | hypothetical protein                                                  |       |           | Hypothetical, unclassified, unknown           | 1   | 1      | 2.20           | na   |         |
| 3655 | elongation factor Ts                                                  | tsf   |           | Translation, post-translational modification  | 4   | 1      | 2.20           | 0.38 |         |
| 5369 | hypothetical protein                                                  |       |           | Hypothetical, unclassified, unknown           | 2   | 1      | 2.18           | 1.07 |         |
| 865  | 4-hydroxyphenylpyruvate dioxygenase                                   | hpd   |           | Amino acid biosynthesis and metabolism        | 12  | 1      | 2.12           | 0.24 |         |
| 1574 | conserved hypothetical protein                                        |       | yaiE      | Hypothetical, unclassified, unknown           | 7   | 1      | 2.06           | 0.22 |         |
| 998  | hypothetical protein                                                  |       |           | Putative enzymes                              | 6   | 2      | 2.04           | 0.24 |         |
| 858  | conserved hypothetical protein                                        |       |           | Hypothetical, unclassified, unknown           | 1   | 1      | 1.94           | na   |         |
| 4481 | rod shape-determining protein MreB                                    | mreB  | envB rodY | Cell division; Cell wall / LPS / capsule      | 3   | 2      | 1.88           | 0.33 |         |
| 3330 | probable short chain dehydrogenase                                    |       |           | Putative enzymes                              | 5   | 1      | 1.86           | 0.08 |         |
| 4457 | conserved hypothetical protein                                        |       | yrbH kpsF | Secreted Factors (toxins, enzymes, alginate)  | 3   | 1      | 1.82           | 0.15 |         |
| 2968 | malonyl-CoA-[acyl-carrier-protein] transacylase                       | fabD  |           | Fatty acid and phospholipid metabolism        | 1   | 1      | 1.81           | na   |         |
| 85   | conserved hypothetical protein                                        |       |           | Hypothetical, unclassified, unknown           | 12  | 1      | 1.78           | 0.11 |         |
| 704  | probable amidase                                                      |       |           | Putative enzymes                              | 1   | 1      | 1.77           | na   |         |
| 2036 | hypothetical protein                                                  |       |           | Hypothetical, unclassified, unknown           | 1   | 1      | 1.71           | na   |         |
| 5036 | glutamate synthase large chain precursor                              | gltB  | aspB      | Amino acid biosynthesis and metabolism        | 1   | 1      | 1.69           | na   |         |
| 1579 | hypothetical protein                                                  |       |           | Hypothetical, unclassified, unknown           | 5   | 1      | 1.68           | 0.33 |         |
| 3504 | probable aldehyde dehydrogenase                                       |       |           | Putative enzymes                              | 3   | 1      | 1.68           | 0.02 |         |
| 3736 | homoserine dehydrogenase                                              | hom   |           | Amino acid biosynthesis and metabolism        | 1   | 1      | 1.66           | na   |         |
| 2953 | electron transfer flavoprotein-ubiquinone oxidoreductase              |       |           | Energy metabolism                             | 9   | 4      | 1.66           | 0.13 |         |
| 604  | probable binding protein component of ABC transporter                 |       |           | Transport of small molecules                  | 2   | 1      | 1.66           | 0.16 |         |
| 3533 | conserved hypothetical protein                                        |       | ydH       | Hypothetical, unclassified, unknown           | 10  | 1      | 1.65           | 0.15 |         |
| 4742 | tRNA pseudouridine 55 synthase                                        | truB  |           | Transcription, RNA processing and degradation | 3   | 1      | 1.65           | 0.25 |         |
| 3193 | glucokinase                                                           | glk   |           | Carbon compound catabolism                    | 1   | 1      | 1.63           | na   |         |
| 999  | 3-oxoacyl-[acyl-carrier-protein] synthase III                         | fabH1 |           | Fatty acid and phospholipid metabolism        | 4   | 1      | 1.63           | 0.13 |         |
| 70   | hypothetical protein                                                  |       |           | Hypothetical, unclassified, unknown           | 10  | 1      | 1.62           | 0.24 |         |
| 5143 | imidazoleglycerol-phosphate dehydratase                               | hisB  |           | Amino acid biosynthesis and metabolism        | 3   | 1      | 1.61           | 0.11 |         |
| 3531 | bacterioferritin                                                      | bfrB  |           | Transport of small molecules                  | 3   | 1      | 1.59           | 0.14 |         |
| 3819 | conserved hypothetical protein                                        |       | ycfJ      | Hypothetical, unclassified, unknown           | 4   | 1      | 1.58           | 0.15 |         |
| 5429 | aspartate ammonia-lyase                                               | aspA  |           | Amino acid biosynthesis and metabolism        | 20  | 3      | 1.57           | 0.30 |         |
| 996  | probable coenzyme A ligase                                            |       |           | Putative enzymes                              | 1   | 1      | 1.57           | na   |         |
| 997  | hypothetical protein                                                  |       |           | Hypothetical, unclassified, unknown           | 16  | 2      | 1.57           | 0.26 |         |
| 3327 | probable non-ribosomal peptide synthetase                             |       |           | Adaptation, protection                        | 2   | 1      | 1.55           | 0.00 |         |
| 2840 | probable ATP-dependent RNA helicase                                   | deaD  |           | Transcription, RNA processing and degradation | 2   | 1      | 1.54           | 0.23 |         |
| 4054 | GTP cyclohydrolase II / 3,4-dihydroxy-2-butanone 4-phosphate synthase | ribB  | ribA      | Biosynthesis of cofactors, prosthetic groups  | 24  | 2      | 1.54           | 0.20 |         |
| 2491 | probable oxidoreductase                                               |       |           | Putative enzymes                              | 9   | 1      | 1.54           | 0.08 |         |
| 4265 | elongation factor Tu                                                  | tufA  |           | Translation                                   | 250 | 8      | 1.53           | 0.24 | 4277    |
| 934  | GTP pyrophosphokinase                                                 | relA  |           | Adaptation, protection                        | 2   | 1      | 1.53           | 0.00 |         |
| 4669 | isopentenyl monophosphate kinase                                      | ipk   | ychB      | Biosynthesis of cofactors, prosthetic groups  | 2   | 1      | 1.52           | 0.17 |         |
| 1520 | probable transcriptional regulator                                    |       |           | Transcriptional regulators                    | 4   | 1      | 1.51           | 0.06 |         |
| 4408 | cell division protein FtsA                                            | ftsA  |           | Cell division                                 | 2   | 1      | 1.51           | 0.15 |         |
| 5049 | 50S ribosomal protein L31                                             | rpmE  |           | Translation                                   | 6   | 2      | 1.51           | 0.12 |         |
| 2641 | NADH dehydrogenase I chain F                                          | nuoF  |           | Energy metabolism                             | 2   | 1      | 1.50           | 0.01 |         |
| 2014 | probable acyl-CoA carboxyltransferase beta chain                      |       |           | Putative enzymes                              | 16  | 2      | 1.50           | 0.23 |         |
| 4410 | D-alanine-D-alanine ligase                                            | ddlB  |           | Cell wall / LPS / capsule                     | 2   | 1      | 1.48           | 0.08 |         |
| 853  | probable oxidoreductase                                               |       |           | Putative enzymes                              | 1   | 1      | 1.48           | na   |         |
| 4258 | 50S ribosomal protein L22                                             | rplV  |           | Translation                                   | 9   | 1      | 1.47           | 0.13 |         |
| 3328 | probable FAD-dependent monooxygenase                                  |       |           | Putative enzymes                              | 5   | 1      | 1.47           | 0.11 |         |
| 5556 | ATP synthase alpha chain                                              | atpA  | unca papA | Energy metabolism                             | 45  | 1      | 1.47           | 0.12 |         |
| 4246 | 30S ribosomal protein S5                                              | rpsE  |           | Translation                                   | 60  | 1      | 1.46           | 0.16 |         |
| 3004 | probable nucleoside phosphorylase                                     |       |           | Nucleotide biosynthesis and metabolism        | 60  | 1      | 1.45           | na   |         |
| 3323 | conserved hypothetical protein                                        |       |           | Hypothetical, unclassified, unknown           | 1   | 1      | 1.45           | na   |         |
| 3918 | molybdopterin biosynthetic protein C                                  | moaC  |           | Biosynthesis of cofactors, prosthetic groups  | 1   | 1      | 1.45           | na   |         |
| 1580 | citrate synthase                                                      | gltA  | cisY      | Energy metabolism                             | 45  | 4      | 1.44           | 0.14 |         |
| 1787 | aconitate hydratase 2                                                 | acnB  |           | Energy metabolism                             | 5   | 1      | 1.44           | 0.09 |         |
| 1266 | probable oxidoreductase                                               |       |           | Putative enzymes                              | 1   | 1      | 1.43           | na   |         |
| 4101 | probable two-component response regulator                             |       |           | Transcriptional regulators                    | 1   | 1      | 1.43           | na   |         |
| 5300 | cytochrome c5                                                         | cycB  |           | Energy metabolism                             | 5   | 1      | 1.43           | 0.11 |         |
| 4239 | 30S ribosomal protein S4                                              | rpsD  |           | Translation                                   | 70  | 6      | 1.43           | 0.28 |         |
| 5312 | probable aldehyde dehydrogenase                                       |       | kaueB     | Putative enzymes                              | 11  | 1      | 1.43           | 0.11 |         |
| 2827 | conserved hypothetical protein                                        |       | yeaA      | Hypothetical, unclassified, unknown           | 1   | 1      | 1.42           | na   |         |
| 3167 | 3-phosphoserine aminotransferase                                      | serC  |           | Amino acid biosynthesis and metabolism        | 1   | 1      | 1.42           | na   |         |
| 609  | anthranilate synthetase component I                                   | trpE  |           | Amino acid biosynthesis and metabolism        | 2   | 1      | 1.42           | 0.11 |         |
| 301  | polyamine transport protein                                           | potF3 |           | Transport of small molecules                  | 7   | 1      | 1.41           | 0.27 |         |
| 4935 | 30S ribosomal protein S6                                              | rpsF  |           | Translation                                   | 32  | 1      | 1.41           | 0.14 |         |
| 4260 | 50S ribosomal protein L2                                              | rplB  |           | Translation                                   | 26  | 3      | 1.41           | 0.29 |         |
| 547  | probable transcriptional regulator                                    |       |           | Transcriptional regulators                    | 4   | 1      | 1.39           | 0.23 |         |
| 2023 | UTP-glucose-1-phosphate uridylyltransferase                           | galU  | hasC gtaB | Central intermediary metabolism               | 43  | 2      | 1.39           | 0.27 |         |
| 266  | 4-aminobutyrate aminotransferase                                      | gabT  |           | Amino acid biosynthesis and metabolism        | 13  | 2      | 1.39           | 0.07 |         |
| 920  | hypothetical protein                                                  |       |           | Hypothetical, unclassified, unknown           | 1   | 1      | 1.38           | na   |         |
| 834  | conserved hypothetical protein                                        |       |           | Hypothetical, unclassified, unknown           | 2   | 1      | 1.38           | 0.09 |         |
| 5051 | arginyl-tRNA synthetase                                               | argS  |           | Translation                                   | 2   | 1      | 1.38           | 0.09 |         |
| 4254 | 30S ribosomal protein S17                                             | rpsQ  |           | Translation                                   | 17  | 1      | 1.38           | 0.14 |         |
| 872  | phenylalanine-4-hydroxylase                                           | phhA  |           | Amino acid biosynthesis and metabolism        | 10  | 1      | 1.38           | 0.17 |         |
| 4406 | UDP-3-O-acetyl-N-acetylglucosamine deacetylase                        | lpxC  | envA asmB | Cell wall / LPS / capsule                     | 2   | 1      | 1.37           | 0.00 |         |
| 1583 | succinate dehydrogenase (A subunit)                                   | sdhA  |           | Energy metabolism                             | 25  | 4      | 1.36           | 0.22 |         |
| 265  | succinate-semialdehyde dehydrogenase                                  | gabD  |           | Amino acid biosynthesis and metabolism        | 20  | 2      | 1.36           | 0.12 |         |
| 4769 | probable transcriptional regulator                                    |       | lldR      | Transcriptional regulators                    | 2   | 1      | 1.36           | 0.08 |         |
| 1748 | probable enoyl-CoA hydratase/isomerase                                |       |           | Putative enzymes                              | 2   | 1      | 1.35           | 0.19 |         |

|      |                                                          |             |                                               |     |   |      |      |            |
|------|----------------------------------------------------------|-------------|-----------------------------------------------|-----|---|------|------|------------|
| 892  | arginine/ornithine transport protein AotP                | aotP        | Transport of small molecules                  | 1   | 1 | 1.35 | na   |            |
| 2620 | ATP-binding protease component ClpA                      | clpA        | Translation                                   | 1   | 1 | 1.35 | na   |            |
| 3831 | leucine aminopeptidase                                   | pepA        | Translation                                   | 14  | 1 | 1.35 | 0.15 |            |
| 1674 | GTP cyclohydrolase I precursor                           | folE2       | Biosynthesis of cofactors, prosthetic groups  | 7   | 1 | 1.35 | 0.14 | 3438       |
| 782  | proline dehydrogenase PutA                               | putA        | Amino acid biosynthesis and metabolism        | 42  | 5 | 1.34 | 0.22 |            |
| 3134 | glutamyl-tRNA synthetase                                 | gltX        | Translation                                   | 7   | 2 | 1.34 | 0.10 |            |
| 2247 | 2-oxoisovalerate dehydrogenase (alpha subunit)           | bkdA1       | Amino acid biosynthesis and metabolism        | 3   | 1 | 1.34 | 0.17 |            |
| 2889 | probable acyl-CoA dehydrogenase                          |             | Putative enzymes                              | 1   | 1 | 1.34 | na   |            |
| 4447 | histidinol-phosphate aminotransferase                    | hisC1       | Amino acid biosynthesis and metabolism        | 2   | 1 | 1.33 | 0.10 |            |
| 4450 | UDP-N-acetylglucosamine 1-carboxyvinyltransferase        | murA        | Cell wall / LPS / capsule                     | 9   | 3 | 1.33 | 0.10 |            |
| 2386 | L-ornithine N5-oxygenase                                 | pvdA        | Adaptation, protection                        | 65  | 2 | 1.33 | 0.17 |            |
| 5046 | malic enzyme                                             |             | Central intermediary metabolism               | 15  | 2 | 1.33 | 0.16 |            |
| 506  | probable acyl-CoA dehydrogenase                          |             | Putative enzymes                              | 37  | 2 | 1.33 | 0.28 |            |
| 5555 | ATP synthase gamma chain                                 | atpG        | Energy metabolism                             | 11  | 1 | 1.33 | 0.08 |            |
| 2624 | isocitrate dehydrogenase                                 | idh         | Energy metabolism                             | 1   | 1 | 1.33 | na   |            |
| 4241 | 30S ribosomal protein S13                                | rpsM        | Translation                                   | 74  | 3 | 1.32 | 0.23 |            |
| 5263 | argininosuccinate lyase                                  | argH        | Amino acid biosynthesis and metabolism        | 3   | 1 | 1.31 | 0.01 |            |
| 4670 | ribose-phosphate pyrophosphokinase                       | prs         | Carbon compound catabolism                    | 10  | 2 | 1.31 | 0.12 |            |
| 3244 | cell division inhibitor MinD                             | minD        | Cell division                                 | 5   | 2 | 1.31 | 0.38 |            |
| 5005 | probable carbamoyl transferase                           |             | Putative enzymes                              | 2   | 1 | 1.30 | 0.08 |            |
| 4314 | formyltetrahydrofolate deformylase                       | purU1       | Nucleotide biosynthesis and metabolism        | 9   | 1 | 1.30 | 0.25 |            |
| 2744 | threonyl-tRNA synthetase                                 | thrS        | Amino acid biosynthesis and metabolism        | 6   | 2 | 1.29 | 0.07 |            |
| 4483 | Glu-tRNA(Gln) amidotransferase subunit A                 | gatA        | Translation, post-translational modification  | 1   | 1 | 1.29 | na   |            |
| 2071 | elongation factor G                                      | fusA2       | Translation, post-translational modification  | 11  | 1 | 1.29 | 0.12 | 4266       |
| 659  | hypothetical protein                                     |             | Hypothetical, unclassified, unknown           | 2   | 1 | 1.29 | 0.04 |            |
| 794  | probable aconitase hydratase                             |             | Energy metabolism                             | 5   | 2 | 1.28 | 0.14 |            |
| 136  | probable ATP-binding component of ABC transporter        |             | Transport of small molecules                  | 1   | 1 | 1.28 | na   |            |
| 1532 | DNA polymerase subunits gamma and tau                    | dnaX        | DNA replication, recombination, modification  | 1   | 1 | 1.28 | na   |            |
| 4270 | DNA-directed RNA polymerase beta chain                   | rpoB        | Transcription, RNA processing and degradation | 15  | 3 | 1.27 | 0.16 |            |
| 3656 | 30S ribosomal protein S2                                 | rpsB        | Translation, post-translational modification  | 15  | 1 | 1.27 | 0.05 |            |
| 3798 | probable aminotransferase                                | ybdL        | Putative enzymes                              | 2   | 2 | 1.27 | 0.16 |            |
| 935  | conserved hypothetical protein                           | mazG        | Hypothetical, unclassified, unknown           | 2   | 1 | 1.26 | 0.23 |            |
| 4673 | conserved hypothetical protein                           | ychF        | Hypothetical, unclassified, unknown           | 2   | 1 | 1.26 | 0.07 |            |
| 4448 | histidinol dehydrogenase                                 | hisD        | Amino acid biosynthesis and metabolism        | 2   | 1 | 1.26 | 0.13 |            |
| 84   | conserved hypothetical protein                           |             | Hypothetical, unclassified, unknown           | 7   | 1 | 1.26 | 0.09 |            |
| 4236 | catalase                                                 | katA        | Adaptation, protection                        | 5   | 1 | 1.25 | 0.04 |            |
| 3001 | probable glyceraldehyde-3-phosphate dehydrogenase        |             | Putative enzymes                              | 41  | 3 | 1.25 | 0.12 |            |
| 3834 | valyl-tRNA synthetase                                    | valS        | Amino acid biosynthesis and metabolism        | 2   | 1 | 1.24 | 0.01 |            |
| 3482 | methionyl-tRNA synthetase                                | metG        | Amino acid biosynthesis and metabolism        | 2   | 2 | 1.24 | 0.24 |            |
| 4395 | conserved hypothetical protein                           |             | Hypothetical, unclassified, unknown           | 7   | 2 | 1.24 | 0.18 |            |
| 2976 | ribonuclease E                                           | rne         | Transcription, RNA processing and degradation | 12  | 1 | 1.24 | 0.07 |            |
| 130  | probable aldehyde dehydrogenase                          |             | Putative enzymes                              | 2   | 1 | 1.24 | 0.00 |            |
| 1760 | probable transcriptional regulator                       |             | Transcriptional regulators                    | 1   | 1 | 1.24 | na   |            |
| 4730 | pantoate-beta-alanine ligase                             | panC        | Biosynthesis of cofactors, prosthetic groups  | 3   | 1 | 1.23 | 0.14 |            |
| 3664 | conserved hypothetical protein                           | yffB        | Hypothetical, unclassified, unknown           | 2   | 2 | 1.23 | 0.08 |            |
| 867  | hypothetical protein                                     |             | Hypothetical, unclassified, unknown           | 30  | 1 | 1.23 | 0.20 |            |
| 774  | conserved hypothetical protein                           | yecP        | Hypothetical, unclassified, unknown           | 1   | 1 | 1.22 | na   |            |
| 1984 | probable aldehyde dehydrogenase                          | exaC1       | Putative enzymes                              | 37  | 4 | 1.22 | 0.26 | 4022       |
| 4500 | probable binding protein component of ABC transporter    |             | Transport of small molecules                  | 5   | 1 | 1.21 | 0.22 |            |
| 3770 | inosine-5'-monophosphate dehydrogenase                   | guaB        | Nucleotide biosynthesis and metabolism        | 4   | 1 | 1.21 | 0.13 |            |
| 945  | phosphoribosylaminoimidazole synthetase                  | purM        | Nucleotide biosynthesis and metabolism        | 3   | 1 | 1.21 | 0.09 |            |
| 1339 | probable ATP-binding component of ABC transporter        |             | Transport of small molecules                  | 8   | 1 | 1.21 | 0.20 |            |
| 2835 | probable MFS transporter                                 |             | Membrane proteins                             | 1   | 1 | 1.21 | na   |            |
| 3013 | fatty-acid oxidation complex beta-subunit                | foaB        | Amino acid biosynthesis and metabolism        | 17  | 1 | 1.21 | 0.24 |            |
| 4266 | elongation factor G                                      | fusA1       | Translation                                   | 21  | 2 | 1.21 | 0.11 |            |
| 382  | DNA mismatch repair protein MicA                         | micA        | DNA replication, recombination, modification  | 2   | 1 | 1.20 | 0.08 |            |
| 300  | polyamine transport protein                              | potF2       | Transport of small molecules                  | 18  | 1 | 1.20 | 0.09 |            |
| 3299 | long-chain-fatty-acid-CoA ligase                         | fadD1       | Fatty acid and phospholipid metabolism        | 14  | 1 | 1.20 | 0.11 |            |
| 2195 | hydrogen cyanide synthase HcnC                           | hcnC        | Central intermediary metabolism               | 1   | 1 | 1.20 | na   |            |
| 2874 | hypothetical protein                                     |             | Hypothetical, unclassified, unknown           | 1   | 1 | 1.20 | na   |            |
| 4688 | iron (III)-transport system permease HiiB                | hiiB        | Membrane proteins                             | 1   | 1 | 1.20 | na   |            |
| 4726 | probable two-component response regulator                |             | Transcriptional regulators                    | 6   | 2 | 1.19 | 0.12 |            |
| 4542 | ClpB protein                                             | clpB        | Translation                                   | 5   | 1 | 1.19 | 0.16 |            |
| 4760 | DnaJ protein                                             | dnaJ        | Adaptation, protection; Chaperones            | 13  | 1 | 1.19 | 0.08 |            |
| 3440 | conserved hypothetical protein                           |             | Hypothetical, unclassified, unknown           | 5   | 1 | 1.19 | 0.13 |            |
| 2345 | conserved hypothetical protein                           |             | Hypothetical, unclassified, unknown           | 1   | 1 | 1.19 | na   |            |
| 4758 | carbamoyl-phosphate synthase small chain                 | carA        | Nucleotide biosynthesis and metabolism        | 2   | 1 | 1.18 | 0.07 |            |
| 936  | hypothetical protein                                     |             | Hypothetical, unclassified, unknown           | 5   | 1 | 1.18 | 0.06 |            |
| 534  | conserved hypothetical protein                           |             | Putative enzymes                              | 6   | 1 | 1.18 | 0.15 |            |
| 3813 | probable iron-binding protein IscU                       | iscU        | Biosynthesis of cofactors                     | 14  | 2 | 1.18 | 0.11 |            |
| 4756 | carbamoylphosphate synthetase large subunit              | carB        | Nucleotide biosynthesis and metabolism        | 3   | 2 | 1.17 | 0.12 |            |
| 5025 | homocysteine synthase                                    | metY        | Amino acid biosynthesis and metabolism        | 11  | 1 | 1.17 | 0.18 |            |
| 5557 | ATP synthase delta chain                                 | atpH        | Energy metabolism                             | 5   | 1 | 1.17 | 0.17 |            |
| 4633 | probable chemotaxis transducer                           |             | Adaptation, protection; Chemotaxis            | 2   | 1 | 1.15 | 0.06 |            |
| 401  | noncatalytic dihydroorotase-like protein                 | pyrX, pyrC' | Nucleotide biosynthesis and metabolism        | 1   | 1 | 1.15 | na   |            |
| 3166 | chorismate mutase                                        | pheA        | Amino acid biosynthesis and metabolism        | 1   | 1 | 1.15 | na   |            |
| 3760 | probable phosphotransferase protein                      | nagF        | Transport of small molecules                  | 1   | 1 | 1.15 | na   |            |
| 3139 | probable amino acid aminotransferase                     | aspC; tyrB  | Amino acid biosynthesis and metabolism        | 28  | 1 | 1.15 | 0.13 |            |
| 3814 | L-cysteine desulfurase (pyridoxal phosphate-dependent)   | iscS        | Amino acid biosynthesis and metabolism        | 7   | 1 | 1.14 | 0.19 |            |
| 5152 | probable ATP-binding component of ABC transporter        |             | Transport of small molecules                  | 1   | 1 | 1.14 | na   |            |
| 546  | methionine adenosyltransferase                           | metK        | Amino acid biosynthesis and metabolism        | 50  | 6 | 1.14 | 0.13 |            |
| 5554 | ATP synthase beta chain                                  | atpD        | Energy metabolism                             | 45  | 1 | 1.14 | 0.13 |            |
| 4751 | cell division protein FtsH                               | ftsH        | Cell division                                 | 8   | 2 | 1.13 | 0.13 |            |
| 222  | probable dihydrodipicolinate synthetase                  |             | Amino acid biosynthesis and metabolism        | 1   | 1 | 1.13 | na   |            |
| 1589 | succinyl-CoA synthetase alpha chain                      | sucD        | Energy metabolism                             | 76  | 4 | 1.13 | 0.20 |            |
| 3529 | probable peroxidase                                      |             | Adaptation, protection; Putative enzymes      | 13  | 1 | 1.12 | 0.16 |            |
| 5106 | conserved hypothetical protein                           | tsaA        | Hypothetical, unclassified, unknown           | 6   | 2 | 1.12 | 0.13 |            |
| 4269 | DNA-directed RNA polymerase beta* chain                  | rpoC        | Transcription, RNA processing and degradation | 24  | 3 | 1.12 | 0.20 |            |
| 1770 | phosphoenolpyruvate synthase                             | ppsA        | Carbon compound catabolism                    | 40  | 3 | 1.12 | 0.23 |            |
| 4015 | conserved hypothetical protein                           |             | Hypothetical, unclassified, unknown           | 5   | 1 | 1.12 | 0.06 |            |
| 4234 | excinuclease ABC subunit A                               | uvrA        | DNA replication, recombination, modification  | 3   | 1 | 1.12 | 0.02 |            |
| 4749 | phosphoglucosamine mutase                                | glmM        | Cell wall / LPS / capsule                     | 5   | 2 | 1.12 | 0.11 |            |
| 4307 | chemotactic transducer PctC                              | pctC        | Adaptation, protection; Chemotaxis            | 30  | 2 | 1.11 | 0.14 | 4309, 4310 |
| 1742 | probable amidotransferase                                |             | Putative enzymes                              | 6   | 1 | 1.11 | 0.15 |            |
| 1301 | probable transmembrane sensor                            |             | Membrane proteins; Transcriptional regulators | 4   | 1 | 1.11 | 0.11 |            |
| 1609 | beta-ketoacyl-ACP synthase I                             | fabB        | Fatty acid and phospholipid metabolism        | 39  | 4 | 1.11 | 0.15 |            |
| 4217 | probable FAD-dependent monooxygenase                     |             | Putative enzymes                              | 1   | 1 | 1.10 | na   |            |
| 5274 | nucleoside diphosphate kinase regulator                  | rnk         | Transcriptional regulators                    | 2   | 1 | 1.10 | 0.00 |            |
| 3790 | outer membrane protein OprC                              | oprC        | Transport of small molecules                  | 2   | 2 | 1.10 | 0.18 |            |
| 1588 | succinyl-CoA synthetase beta chain                       | sucC        | Energy metabolism                             | 110 | 5 | 1.10 | 0.15 |            |
| 4525 | type 4 fibrillar precursor PilA                          | pilA        | Motility & Attachment                         | 25  | 2 | 1.10 | 0.23 |            |
| 2445 | glycine cleavage system protein P2                       | gcvP2       | Amino acid biosynthesis and metabolism        | 85  | 5 | 1.10 | 0.27 |            |
| 2197 | conserved hypothetical protein                           | ycnB        | Putative enzymes                              | 3   | 1 | 1.10 | 0.03 |            |
| 3762 | hypothetical protein                                     |             | Hypothetical, unclassified, unknown           | 4   | 1 | 1.10 | 0.05 |            |
| 1013 | phosphoribosylaminoimidazole-succinocarboxamide synthase | purC        | Nucleotide biosynthesis and metabolism        | 12  | 2 | 1.09 | 0.15 |            |
| 91   | conserved hypothetical protein                           |             | Hypothetical, unclassified, unknown           | 1   | 1 | 1.09 | na   |            |
| 4578 | hypothetical protein                                     |             | Hypothetical, unclassified, unknown           | 2   | 1 | 1.09 | na   |            |
| 4052 | NusB protein                                             | nusB        | Transcription, RNA processing and degradation | 3   | 1 | 1.09 | 0.14 |            |
| 964  | conserved hypothetical protein                           | ssyB        | Hypothetical, unclassified, unknown           | 6   | 1 | 1.09 | 0.11 |            |
| 2385 | probable acylase                                         | yebC        | Putative enzymes                              | 23  | 3 | 1.09 | 0.16 |            |
| 3397 | ferredoxin--NADP+ reductase                              | fpr         | Biosynthesis of cofactors, prosthetic groups  | 3   | 1 | 1.09 | 0.09 |            |
| 3021 | hypothetical protein                                     |             | Hypothetical, unclassified, unknown           | 8   | 1 | 1.08 | 0.10 |            |

|      |                                                                                |       |                                               |                                               |    |      |      |      |
|------|--------------------------------------------------------------------------------|-------|-----------------------------------------------|-----------------------------------------------|----|------|------|------|
| 548  | transketolase                                                                  | tktA  | Energy metabolism                             | 5                                             | 1  | 1.08 | 0.09 |      |
| 2950 | hypothetical protein                                                           |       | Hypothetical, unclassified, unknown           | 10                                            | 1  | 1.07 | 0.04 |      |
| 4240 | 30S ribosomal protein S11                                                      | rpsK  | Translation                                   | 12                                            | 2  | 1.07 | 0.10 |      |
| 2621 | conserved hypothetical protein                                                 |       | Hypothetical, unclassified, unknown           | 2                                             | 1  | 1.07 | 0.14 |      |
| 4423 | conserved hypothetical protein                                                 | yraM  | Hypothetical, unclassified, unknown           | 1                                             | 1  | 1.07 | na   |      |
| 3329 | hypothetical protein                                                           |       | Hypothetical, unclassified, unknown           | 30                                            | 2  | 1.07 | 0.08 |      |
| 854  | fumarate hydratase                                                             | fumC2 | Carbon compound catabolism                    | 3                                             | 1  | 1.07 | 0.09 |      |
| 3645 | (3R)-hydroxymyristoyl-[acyl carrier protein] dehydratase                       | fabZ  | Cell wall / LPS / capsule                     | 2                                             | 1  | 1.06 | 0.01 |      |
| 4938 | adenylosuccinate synthetase                                                    | purA  | Nucleotide biosynthesis and metabolism        | 10                                            | 1  | 1.06 | 0.10 |      |
| 3263 | conserved hypothetical protein                                                 |       | Hypothetical, unclassified, unknown           | 1                                             | 1  | 1.06 | na   |      |
| 3999 | D-ala-D-ala-carboxypeptidase                                                   | yaiD  | Cell wall / LPS / capsule                     | 12                                            | 1  | 1.05 | 0.11 |      |
| 4701 | conserved hypothetical protein                                                 | dacC  | dacD                                          | 12                                            | 2  | 1.05 | 0.11 |      |
| 2770 | hypothetical protein                                                           |       | Hypothetical, unclassified, unknown           | 1                                             | 1  | 1.05 | na   |      |
| 4431 | probable iron-sulfur protein                                                   |       | Putative enzymes                              | 2                                             | 1  | 1.05 | 0.00 |      |
| 1585 | 2-oxoglutarate dehydrogenase (E1 subunit)                                      | sucA  | Energy metabolism                             | 9                                             | 1  | 1.04 | 0.03 |      |
| 3347 | hypothetical protein                                                           |       | Hypothetical, unclassified, unknown           | 2                                             | 1  | 1.04 | 0.01 |      |
| 5164 | dTDP-4-dehydrohamnose 3,5-epimerase                                            | rmlC  | Cell wall / LPS / capsule                     | 2                                             | 1  | 1.04 | 0.09 |      |
| 4560 | isoleucyl-tRNA synthetase                                                      | ileS  | Translation                                   | 10                                            | 2  | 1.04 | 0.06 |      |
| 4694 | ketol-acid reductoisomerase                                                    | ilvC  | Amino acid biosynthesis and metabolism        | 51                                            | 4  | 1.04 | 0.13 |      |
| 387  | conserved hypothetical protein                                                 | yggV  | Hypothetical, unclassified, unknown           | 6                                             | 2  | 1.04 | 0.11 |      |
| 1642 | selenophosphate synthetase                                                     | selD  | Translation                                   | 1                                             | 1  | 1.03 | na   |      |
| 2999 | Na <sup>+</sup> -translocating NADH:ubiquinone oxidoreductase subunit Nrq1nqrA |       | Energy metabolism                             | 1                                             | 1  | 1.03 | na   |      |
| 5426 | phosphoribosylaminoimidazole carboxylase, catalytic subunit                    | purE  | Nucleotide biosynthesis and metabolism        | 1                                             | 1  | 1.03 | na   |      |
| 1459 | probable methyltransferase                                                     | cheB  | Chemotaxis                                    | 6                                             | 2  | 1.03 | 0.15 |      |
| 4484 | Glu-tRNA(Gln) amidotransferase subunit B                                       | gatB  | Translation, post-translational modification  | 7                                             | 2  | 1.03 | 0.16 |      |
| 4848 | biotin carboxylase                                                             | accC  | Fatty acid and phospholipid metabolism        | 11                                            | 1  | 1.03 | 0.11 |      |
| 3159 | probable UDP-glucose/GDP-mannose dehydrogenase WbpA                            | wbpA  | Cell wall / LPS / capsule; Putative enzymes   | 2                                             | 1  | 1.02 | 0.03 |      |
| 4957 | phosphatidylserine decarboxylase                                               | psd   | Amino acid biosynthesis and metabolism        | 2                                             | 1  | 1.02 | 0.00 |      |
| 5225 | hypothetical protein                                                           |       | Hypothetical, unclassified, unknown           | 2                                             | 1  | 1.02 | 0.10 |      |
| 3158 | probable oxidoreductase WpbB                                                   | wpbB  | Cell wall / LPS / capsule; Putative enzymes   | 34                                            | 3  | 1.02 | 0.07 |      |
| 871  | pterin-4-alpha-carbinolamine dehydratase                                       | phhB  | Amino acid biosynthesis and metabolism        | 20                                            | 2  | 1.02 | 0.19 |      |
| 1307 | conserved hypothetical protein                                                 | yafJ  | Fatty acid and phospholipid metabolism        | 13                                            | 2  | 1.02 | 0.25 |      |
| 2553 | probable acyl-CoA thiolase                                                     |       | Putative enzymes                              | 24                                            | 3  | 1.02 | 0.12 |      |
| 899  | succinylarginine dihydrolase                                                   | aruB  | Amino acid biosynthesis and metabolism        | 3                                             | 1  | 1.02 | 0.13 |      |
| 1587 | lipamide dehydrogenase-glc                                                     | lpdG  | Energy metabolism                             | 24                                            | 2  | 1.01 | 0.11 |      |
| 3861 | ATP-dependent RNA helicase RhlB                                                | rhlB  | Transcription, RNA processing and degradation | 12                                            | 2  | 1.01 | 0.08 |      |
| 105  | cytochrome c oxidase, subunit II                                               | coxB  | coll                                          | 1                                             | 1  | 1.01 | na   |      |
| 3068 | conserved hypothetical protein                                                 |       | Hypothetical, unclassified, unknown           | 6                                             | 1  | 1.01 | 0.05 |      |
| 3226 | probable hydrolase                                                             |       | Putative enzymes                              | 1                                             | 1  | 1.01 | na   |      |
| 1162 | succinyl-diaminopimelate desuccinylase                                         | dapE  | Amino acid biosynthesis and metabolism        | 10                                            | 2  | 1.01 | 0.11 |      |
| 3017 | conserved hypothetical protein                                                 |       | Hypothetical, unclassified, unknown           | 5                                             | 1  | 1.01 | 0.16 |      |
| 1010 | dihydrodipicolinate synthase                                                   | dapA  | Amino acid biosynthesis and metabolism        | 6                                             | 3  | 1.01 | 0.16 |      |
| 3987 | leucyl-tRNA synthetase                                                         | leuS  | Translation                                   | 14                                            | 3  | 1.00 | 0.25 |      |
| 5015 | pyruvate dehydrogenase                                                         | aceA  | Energy metabolism                             | 7                                             | 1  | 1.00 | 0.07 |      |
| 3164 | still frameshift 3-PHOSPHOSHIKIMATE                                            |       |                                               |                                               |    |      |      |      |
|      | 1-CARBOXYVINYLTRANSFERASE prephenate dehydrogenase                             |       | Amino acid biosynthesis and metabolism        | 1                                             | 1  | 1.00 | na   |      |
| 3295 | probable HIT family protein                                                    |       | Putative enzymes                              | 1                                             | 1  | 1.00 | na   |      |
| 3471 | probable malic enzyme                                                          | sfcA  | Central intermediary metabolism               | 2                                             | 2  | 1.00 | 0.06 |      |
| 3657 | methionine aminopeptidase                                                      | map   | Translation                                   | 3                                             | 1  | 1.00 | 0.07 |      |
| 5564 | glucose inhibited division protein B                                           | gidB  | Cell division                                 | 2                                             | 1  | 1.00 | 0.01 |      |
| 1    | chromosomal replication initiator protein DnaA                                 | dnaA  | DNA replication, recombination, modification  | 7                                             | 1  | 1.00 | 0.15 |      |
| 4502 | probable binding protein component of ABC transporter                          |       | Transport of small molecules                  | 4                                             | 2  | 0.99 | 0.01 |      |
| 4744 | translation initiation factor IF-2                                             | infB  | Translation                                   | 6                                             | 1  | 0.99 | 0.07 |      |
| 1202 | probable hydrolase                                                             | ycaC  | Putative enzymes                              | 3                                             | 1  | 0.99 | 0.03 |      |
| 3635 | enolase                                                                        | eno   | Energy metabolism                             | 12                                            | 1  | 0.99 | 0.14 |      |
| 2991 | soluble pyridine nucleotide transhydrogenase                                   | sth   | Nucleotide biosynthesis and metabolism        | 3                                             | 1  | 0.99 | 0.05 |      |
| 296  | probable glutamine synthetase                                                  |       | Putative enzymes                              | 2                                             | 1  | 0.99 | 0.03 |      |
| 1796 | 5,10-methylene-tetrahydrofolate dehydrogenase / cyclohydrolaseI                | folD  | Biosynthesis of cofactors, prosthetic groups  | 4                                             | 1  | 0.99 | 0.00 |      |
| 2412 | conserved hypothetical protein                                                 |       | Hypothetical, unclassified, unknown           | 6                                             | 1  | 0.99 | 0.15 |      |
| 3637 | CTP synthase                                                                   | pyrG  | Nucleotide biosynthesis and metabolism        | 4                                             | 1  | 0.99 | 0.10 |      |
| 3686 | adenylate kinase                                                               | adk   | Nucleotide biosynthesis and metabolism        | 4                                             | 2  | 0.99 | 0.12 |      |
| 4389 | probable short-chain dehydrogenase                                             |       | Putative enzymes                              | 17                                            | 2  | 0.98 | 0.11 |      |
| 747  | probable aldehyde dehydrogenase                                                |       | Putative enzymes                              | 1                                             | 1  | 0.98 | na   |      |
| 2304 | hypothetical protein                                                           |       | Hypothetical, unclassified, unknown           | 1                                             | 1  | 0.98 | na   |      |
| 3769 | GMP synthase                                                                   | guaA  | Amino acid biosynthesis and metabolism        | 3                                             | 1  | 0.98 | 0.06 |      |
| 5245 | conserved hypothetical protein                                                 | yhbL  | Hypothetical, unclassified, unknown           | 15                                            | 3  | 0.97 | 0.13 |      |
| 2    | DNA polymerase III, beta chain                                                 | dnaN  | DNA replication, recombination, modification  | 12                                            | 2  | 0.97 | 0.15 |      |
| 3356 | conserved hypothetical protein                                                 |       | Hypothetical, unclassified, unknown           | 4                                             | 1  | 0.97 | 0.15 |      |
| 4075 | hypothetical protein                                                           |       | Hypothetical, unclassified, unknown           | 2                                             | 1  | 0.97 | 0.11 |      |
| 4740 | polyribonucleotide nucleotidyltransferase                                      | pnp   | Transcription, RNA processing and degradation | 2                                             | 1  | 0.97 | 0.04 |      |
| 1707 | regulatory protein PcrH                                                        | pcrH  | Protein secretion/export apparatus            | 1                                             | 1  | 0.97 | na   |      |
| 4889 | probable oxidoreductase                                                        |       | Putative enzymes                              | 1                                             | 1  | 0.97 | na   |      |
| 4496 | probable binding protein component of ABC transporter                          |       | Transport of small molecules                  | 3                                             | 1  | 0.96 | 0.10 |      |
| 3525 | argininosuccinate synthase                                                     | argG  | Amino acid biosynthesis and metabolism        | 19                                            | 1  | 0.96 | 0.16 |      |
| 956  | prolyl-tRNA synthetase                                                         | proS  | Translation                                   | 11                                            | 2  | 0.96 | 0.06 |      |
| 4235 | bacterioferritin                                                               | bfrA  | Adaptation, protection                        | 5                                             | 1  | 0.96 | 0.10 |      |
| 4995 | probable acyl-CoA dehydrogenase                                                |       | Putative enzymes                              | 1                                             | 1  | 0.95 | na   |      |
| 5313 | probable pyridoxal-dependent aminotransferase                                  | paat  | Putative enzymes                              | 2                                             | 1  | 0.95 | na   |      |
| 447  | glutaryl-CoA dehydrogenase                                                     | gcdH  | Carbon compound catabolism                    | 10                                            | 1  | 0.95 | 0.10 |      |
| 1074 | branched-chain amino acid transport protein BraC                               | braC  | Transport of small molecules                  | 2                                             | 1  | 0.95 | 0.11 |      |
| 4916 | hypothetical protein                                                           |       | Hypothetical, unclassified, unknown           | 5                                             | 1  | 0.95 | 0.22 |      |
| 5224 | aminopeptidase P                                                               | pepP  | Translation                                   | 3                                             | 2  | 0.95 | 0.20 |      |
| 2069 | probable carbamoyl transferase                                                 |       | Putative enzymes                              | 2                                             | 2  | 0.94 | 0.11 |      |
| 4513 | probable oxidoreductase                                                        |       | Putative enzymes                              | 1                                             | 1  | 0.94 | na   |      |
| 4723 | suppressor protein DksA                                                        | dksA  | DNA replication, recombination, modification  | 1                                             | 1  | 0.94 | na   |      |
| 795  | citrate synthase 2                                                             | prpC  | Carbon compound catabolism                    | 20                                            | 2  | 0.94 | 0.08 |      |
| 5119 | glutamine synthetase                                                           | glhA  | Amino acid biosynthesis and metabolism        | 18                                            | 1  | 0.94 | 0.10 |      |
| 2623 | isocitrate dehydrogenase                                                       | icd   | Energy metabolism                             | 89                                            | 3  | 0.94 | 0.21 |      |
| 4874 | conserved hypothetical protein                                                 | psiF  | Hypothetical, unclassified, unknown           | 102                                           | 4  | 0.94 | 0.14 |      |
| 317  | hypothetical protein                                                           |       | Hypothetical, unclassified, unknown           | 8                                             | 1  | 0.93 | 0.10 |      |
| 4922 | azurin precursor                                                               | azu   | Energy metabolism                             | 42                                            | 2  | 0.93 | 0.10 |      |
| 2302 | probable non-ribosomal peptide synthetase                                      |       | Putative enzymes                              | 5                                             | 2  | 0.93 | 0.09 |      |
| 3978 | hypothetical protein                                                           |       | Hypothetical, unclassified, unknown           | 1                                             | 1  | 0.93 | na   |      |
| 4920 | NH3-dependent NAD synthetase                                                   | nadE  | Biosynthesis of cofactors, prosthetic groups  | 23                                            | 2  | 0.93 | 0.08 |      |
| 2008 | fumarylacetoacetase                                                            | fahA  | Carbon compound catabolism                    | 17                                            | 4  | 0.93 | 0.10 |      |
| 3977 | glutamate-1-semialdehyde 2,1-aminomutase                                       | hemL  | Biosynthesis of cofactors, prosthetic groups  | 8                                             | 1  | 0.92 | 0.11 |      |
| 4854 | phosphoribosylaminoimidazolecarboxamide formyltransferase                      | purH  | Nucleotide biosynthesis and metabolism        | 6                                             | 1  | 0.92 | 0.04 |      |
| 4472 | PmbA protein                                                                   | pmbA  | Adaptation, protection; Translation           | 9                                             | 1  | 0.92 | 0.12 |      |
| 1801 | ATP-dependent Clp protease proteolytic subunit                                 | clpP  | Chaperones & heat shock proteins              | 8                                             | 1  | 0.92 | 0.08 |      |
| 1843 | methionine synthase                                                            | metH  | Amino acid biosynthesis and metabolism        | 1                                             | 1  | 0.92 | na   |      |
| 3043 | conserved hypothetical protein                                                 |       | Hypothetical, unclassified, unknown           | 1                                             | 1  | 0.92 | na   |      |
| 3345 | hypothetical protein                                                           |       | Hypothetical, unclassified, unknown           | 1                                             | 1  | 0.92 | na   |      |
| 139  | alkyl hydroperoxide reductase subunit C                                        | ahpC  | Adaptation, protection                        | 41                                            | 1  | 0.92 | 0.09 |      |
| 4676 | probable carbonic anhydrase                                                    | yadF  | Putative enzymes                              | 3                                             | 1  | 0.91 | 0.14 |      |
| 1754 | transcriptional regulator CysB                                                 | cysB  | Amino acid biosynthesis and metabolism        | 2                                             | 1  | 0.91 | 0.00 |      |
| 3582 | glycerol kinase                                                                | glpK  | Central intermediary metabolism               | 20                                            | 3  | 0.91 | 0.17 |      |
| 1772 | probable methyltransferase                                                     | menG  | Biosynthesis of cofactors, prosthetic groups  | 3                                             | 1  | 0.90 | 0.04 |      |
| 5435 | probable transcarboxylase subunit                                              | oadA  | Central intermediary metabolism               | 2                                             | 2  | 0.90 | 0.09 |      |
| 5334 | ribonuclease PH                                                                | rph   | Transcription, RNA processing and degradation | 3                                             | 1  | 0.90 | 0.12 |      |
| 917  | potassium uptake protein Kup                                                   | kup   | Transport of small molecules                  | 2                                             | 1  | 0.90 | 0.01 |      |
| 963  | aspartyl-tRNA synthetase                                                       | aspS  | syd                                           | Transcription, RNA processing and degradation | 30 | 2    | 0.90 | 0.05 |
| 1455 | sigma factor FlIA                                                              | flIA  | rpoF                                          | Transcriptional regulators                    | 2  | 1    | 0.90 | 0.10 |

|      |                                                                 |       |        |                                                   |                                           |    |      |      |      |
|------|-----------------------------------------------------------------|-------|--------|---------------------------------------------------|-------------------------------------------|----|------|------|------|
| 3640 | DNA polymerase III, alpha chain                                 | dnaE  | polC   | DNA replication, recombination, modification      | 1                                         | 1  | 0.90 | na   |      |
| 1097 | transcriptional regulator FleQ                                  | fleQ  |        | Motility & Attachment; Transcriptional regulators | 5                                         | 1  | 0.89 | 0.13 |      |
| 2990 | probable phosphodiesterase                                      | ugpQ  |        | Central intermediary metabolism                   | 9                                         | 2  | 0.89 | 0.06 |      |
| 5317 | probable binding protein component of ABC dipeptide transporter |       |        | Transport of small molecules                      | 3                                         | 1  | 0.89 | 0.14 |      |
| 1618 | conserved hypothetical protein                                  | ybdB  |        | Hypothetical, unclassified, unknown               | 2                                         | 1  | 0.89 | 0.06 |      |
| 469  | hypothetical protein                                            |       |        | Hypothetical, unclassified, unknown               | 2                                         | 1  | 0.88 | 0.00 |      |
| 3797 | conserved hypothetical protein                                  | yafV  |        | Hypothetical, unclassified, unknown               | 2                                         | 1  | 0.88 | 0.00 |      |
| 4434 | probable oxidoreductase                                         |       |        | Putative enzymes                                  | 3                                         | 1  | 0.88 | 0.05 |      |
| 1681 | chorismate synthase                                             | aroC  |        | Amino acid biosynthesis and metabolism            | 5                                         | 2  | 0.88 | 0.05 |      |
| 3628 | probable esterase                                               | yeiG  |        | Putative enzymes                                  | 5                                         | 1  | 0.87 | 0.09 |      |
| 3117 | aspartate semialdehyde dehydrogenase                            | asd   |        | Amino acid biosynthesis and metabolism            | 7                                         | 1  | 0.87 | 0.05 |      |
| 1160 | hypothetical protein                                            |       |        | Hypothetical, unclassified, unknown               | 2                                         | 1  | 0.87 | 0.01 |      |
| 1584 | succinate dehydrogenase (B subunit)                             | sdhB  |        | Energy metabolism                                 | 2                                         | 1  | 0.87 | 0.07 |      |
| 5179 | probable transcriptional regulator                              |       |        | Transcriptional regulators                        | 1                                         | 1  | 0.87 | na   |      |
| 5223 | ubiH protein                                                    | ubiH  | visB   | Biosynthesis of cofactors, prosthetic groups      | 2                                         | 1  | 0.87 | 0.00 |      |
| 5304 | D-amino acid dehydrogenase, small subunit                       | dadA  |        | Amino acid biosynthesis and metabolism            | 3                                         | 1  | 0.86 | 0.08 |      |
| 5349 | probable rubredoxin reductase                                   |       |        | Carbon compound catabolism                        | 2                                         | 1  | 0.86 | 0.01 |      |
| 2248 | 2-oxoisovalerate dehydrogenase (beta subunit)                   | bkdA2 |        | Amino acid biosynthesis and metabolism            | 17                                        | 3  | 0.86 | 0.11 |      |
| 2400 | probable non-ribosomal peptide synthetase                       |       |        | Adaptation, protection                            | 3                                         | 2  | 0.86 | 0.11 |      |
| 2001 | acetyl-CoA acetyltransferase                                    | atoB  |        | Central intermediary metabolism                   | 18                                        | 1  | 0.86 | 0.13 |      |
| 1287 | probable glutathione peroxidase                                 |       |        | Putative enzymes                                  | 3                                         | 1  | 0.86 | 0.03 |      |
| 3975 | phosphomethylpyrimidine kinase                                  | thiD  |        | Biosynthesis of cofactors, prosthetic groups      | 2                                         | 1  | 0.85 | 0.01 |      |
| 4336 | conserved hypothetical protein                                  |       |        | Hypothetical, unclassified, unknown               | 6                                         | 1  | 0.85 | 0.14 |      |
| 4053 | 6,7-dimethyl-8-ribityllumazine synthase                         | ribE  | ribH   | Biosynthesis of cofactors, prosthetic groups      | 5                                         | 1  | 0.85 | 0.09 |      |
| 4242 | 50S ribosomal protein L36                                       | rpmJ  |        | Translation                                       | 27                                        | 1  | 0.85 | 0.09 |      |
| 3568 | probable acetyl-coa synthetase                                  | ymmS  |        | Putative enzymes                                  | 1                                         | 1  | 0.85 | na   |      |
| 318  | conserved hypothetical protein                                  | hpcE  |        | Hypothetical, unclassified, unknown               | 8                                         | 1  | 0.85 | 0.04 |      |
| 67   | oligopeptidase A                                                | prlC  | opdA   | Translation                                       | 3                                         | 2  | 0.84 | 0.18 |      |
| 1344 | probable short-chain dehydrogenase                              | yvaG  |        | Putative enzymes                                  | 5                                         | 1  | 0.84 | 0.08 |      |
| 2612 | seryl-tRNA synthetase                                           | serS  |        | Translation, post-translational modification      | 8                                         | 2  | 0.84 | 0.16 |      |
| 5172 | ornithine carbamoyltransferase, catabolic                       | arcB  |        | Amino acid biosynthesis and metabolism            | 27                                        | 2  | 0.84 | 0.12 |      |
| 2402 | probable non-ribosomal peptide synthetase                       |       |        | Putative enzymes                                  | 21                                        | 4  | 0.84 | 0.10 |      |
| 1969 | hypothetical protein                                            |       |        | Hypothetical, unclassified, unknown               | 2                                         | 1  | 0.83 | 0.01 |      |
| 2952 | electron transfer flavoprotein beta-subunit                     | etfB  |        | Energy metabolism                                 | 42                                        | 1  | 0.83 | 0.10 |      |
| 3286 | hypothetical protein                                            |       |        | Hypothetical, unclassified, unknown               | 4                                         | 1  | 0.83 | 0.11 |      |
| 2815 | probable acyl-CoA dehydrogenase                                 | yafH  |        | Putative enzymes                                  | 4                                         | 1  | 0.82 | 0.07 |      |
| 3182 | conserved hypothetical protein                                  | pgl   |        | Hypothetical, unclassified, unknown               | 3                                         | 1  | 0.82 | 0.12 |      |
| 2532 | thiol peroxidase                                                | tpx   |        | Adaptation, protection                            | 83                                        | 3  | 0.82 | 0.14 |      |
| 5174 | probable beta-ketoacyl synthase                                 |       |        | Fatty acid and phospholipid metabolism            | 2                                         | 1  | 0.82 | 0.19 |      |
| 4425 | probable phosphotriose isomerase                                |       |        | Putative enzymes                                  | 5                                         | 1  | 0.82 | 0.12 |      |
| 4402 | glutamate N-acetyltransferase                                   | argJ  | yraO   | Amino acid biosynthesis and metabolism            | 4                                         | 2  | 0.81 | 0.07 |      |
| 3862 | hypothetical protein                                            |       |        | Hypothetical, unclassified, unknown               | 1                                         | 1  | 0.81 | na   |      |
| 4168 | probable TonB-dependent receptor                                |       |        | Transport of small molecules                      | 1                                         | 1  | 0.81 | na   |      |
| 5192 | phosphoenolpyruvate carboxykinase                               | pckA  |        | Carbon compound catabolism                        | 2                                         | 1  | 0.81 | 0.08 |      |
| 2116 | conserved hypothetical protein                                  |       |        | Hypothetical, unclassified, unknown               | 2                                         | 1  | 0.80 | 0.01 |      |
| 4971 | conserved hypothetical protein                                  | yrqIE |        | Hypothetical, unclassified, unknown               | 1                                         | 1  | 0.80 | na   |      |
| 5208 | conserved hypothetical protein                                  |       |        | Hypothetical, unclassified, unknown               | 1                                         | 1  | 0.80 | na   |      |
| 5239 | transcription termination factor Rho                            | rho   |        | Transcription, RNA processing and degradation     | 2                                         | 1  | 0.80 | 0.03 |      |
| 1794 | glutaminyl-tRNA synthetase                                      | glnS  |        | Amino acid biosynthesis and metabolism            | 27                                        | 3  | 0.80 | 0.12 |      |
| 36   | tryptophan synthase beta chain                                  | trpB  |        | Amino acid biosynthesis and metabolism            | 1                                         | 1  | 0.79 | na   |      |
| 3613 | hypothetical protein                                            |       |        | Hypothetical, unclassified, unknown               | 1                                         | 1  | 0.79 | na   |      |
| 1913 | hypothetical protein                                            |       |        | Hypothetical, unclassified, unknown               | 2                                         | 1  | 0.79 | 0.07 |      |
| 2012 | probable acyl-CoA carboxylase alpha chain                       | accA  |        | Fatty acid and phospholipid metabolism            | 8                                         | 1  | 0.79 | 0.09 |      |
| 3112 | acetyl-CoA carboxylase beta subunit                             | accD  | dedB   | Fatty acid and phospholipid metabolism            | 2                                         | 2  | 0.79 | 0.01 |      |
| 4732 | glucose-6-phosphate isomerase                                   | pgi   |        | Carbon compound catabolism                        | 6                                         | 1  | 0.79 | 0.09 |      |
| 3584 | glycerol-3-phosphate dehydrogenase                              | glpD  |        | Central intermediary metabolism                   | 10                                        | 2  | 0.79 | 0.11 |      |
| 1292 | probable 3-mercaptopyruvate sulfurtransferase                   |       |        | Putative enzymes                                  | 4                                         | 1  | 0.78 | 0.10 |      |
| 3029 | molybdopterin biosynthetic protein B2                           | moaB2 |        | Biosynthesis of cofactors, prosthetic groups      | 2                                         | 1  | 0.78 | 0.04 |      |
| 2444 | serine hydroxymethyltransferase                                 | glyA2 |        | Amino acid biosynthesis and metabolism            | 15                                        | 2  | 0.78 | 0.14 |      |
| 2399 | pyoverdine synthase D                                           | pvdD  |        | Adaptation, protection; Secreted Factors          | 4                                         | 1  | 0.78 | 0.25 |      |
| 5022 | conserved hypothetical protein                                  | aefA  |        | Hypothetical, unclassified, unknown               | 1                                         | 1  | 0.78 | na   |      |
| 2401 | probable non-ribosomal peptide synthetase                       |       |        | Adaptation, protection                            | 3                                         | 1  | 0.78 | 0.07 |      |
| 4936 | probable rRNA methylase                                         | yjFH  | spoU   | Transcription, RNA processing and degradation     | 5                                         | 1  | 0.78 | 0.05 |      |
| 5277 | diaminopimelate decarboxylase                                   | lysA  |        | Amino acid biosynthesis and metabolism            | 12                                        | 2  | 0.78 | 0.09 |      |
| 586  | conserved hypothetical protein                                  | ycgB  |        | Hypothetical, unclassified, unknown               | 8                                         | 2  | 0.77 | 0.13 |      |
| 5128 | secretion protein SecB                                          | secB  |        | Protein secretion/export apparatus                | 14                                        | 2  | 0.76 | 0.12 |      |
| 870  | aromatic amino acid aminotransferase                            | phhC  | tyrB   | aspC                                              | Amino acid biosynthesis and metabolism    | 44 | 2    | 0.76 | 0.15 |
| 3011 | DNA topoisomerase I                                             | topA  |        | DNA replication, recombination, modification      | 7                                         | 3  | 0.76 | 0.03 |      |
| 3195 | glyceraldehyde 3-phosphate dehydrogenase                        | gapA  |        | Energy metabolism                                 | 8                                         | 1  | 0.76 | 0.03 |      |
| 1072 | branched-chain amino acid transport protein BraE                | braE  |        | Transport of small molecules                      | 2                                         | 1  | 0.76 | 0.01 |      |
| 3723 | probable FMN oxidoreductase                                     | yrqJM |        | Putative enzymes                                  | 1                                         | 1  | 0.76 | na   |      |
| 4547 | two-component response regulator PiIR                           | piIR  |        | Motility & Attachment; Transcriptional regulator  | 1                                         | 1  | 0.76 | na   |      |
| 5344 | probable transcriptional regulator                              |       |        | Transcriptional regulators                        | 2                                         | 1  | 0.76 | 0.00 |      |
| 5163 | glucose-1-phosphate thymidyltransferase                         | rmlA  | rfbA   |                                                   | Cell wall / LPS / capsule                 | 13 | 1    | 0.76 | 0.10 |
| 3148 | probable UDP-N-acetylglucosamine 2-epimerase WbpI               | wbpI  |        | Cell wall / LPS / capsule; Putative enzymes       | 4                                         | 2  | 0.75 | 0.08 |      |
| 652  | transcriptional regulator Vfr                                   | vfr   |        | Transcriptional regulators                        | 1                                         | 1  | 0.74 | na   |      |
| 1412 | hypothetical protein                                            |       |        | Hypothetical, unclassified, unknown               | 1                                         | 1  | 0.74 | na   |      |
| 902  | hypothetical protein                                            |       |        | Hypothetical, unclassified, unknown               | 1                                         | 1  | 0.73 | na   |      |
| 5171 | arginine deiminase                                              | arcA  |        | Amino acid biosynthesis and metabolism            | 9                                         | 2  | 0.73 | 0.09 |      |
| 4180 | probable acetolactate synthase large subunit                    |       |        | Amino acid biosynthesis and metabolism            | 2                                         | 1  | 0.73 | 0.05 |      |
| 4329 | pyruvate kinase II                                              | pykA  | pyk-II |                                                   | Energy metabolism                         | 1  | 1    | 0.72 | na   |
| 5320 | DNA/pantothenate metabolism flavoprotein                        | dtp   |        | DNA replication, recombination, modification      | 2                                         | 1  | 0.72 | 0.00 |      |
| 947  | conserved hypothetical protein                                  |       |        | Hypothetical, unclassified, unknown               | 2                                         | 1  | 0.72 | 0.02 |      |
| 3366 | aliphatic amidase                                               | amiE  |        | Carbon compound catabolism                        | 1                                         | 1  | 0.71 | na   |      |
| 3919 | conserved hypothetical protein                                  |       |        | Hypothetical, unclassified, unknown               | 5                                         | 1  | 0.70 | 0.13 |      |
| 4199 | probable acyl-CoA dehydrogenase                                 | ylaK  |        | Putative enzymes                                  | 2                                         | 1  | 0.70 | 0.06 |      |
| 2312 | probable transcriptional regulator                              |       |        | Transcriptional regulators                        | 1                                         | 1  | 0.70 | na   |      |
| 3332 | conserved hypothetical protein                                  |       |        | Hypothetical, unclassified, unknown               | 1                                         | 1  | 0.70 | na   |      |
| 3088 | conserved hypothetical protein                                  | yfjB  |        | Hypothetical, unclassified, unknown               | 3                                         | 1  | 0.69 | 0.08 |      |
| 4268 | 30S ribosomal protein S12                                       | rpsL  | str    |                                                   | Translation                               | 1  | 1    | 0.69 | na   |
| 5100 | urocanase                                                       | hutU  |        | Amino acid biosynthesis and metabolism            | 27                                        | 3  | 0.68 | 0.07 |      |
| 5173 | carbamate kinase                                                | arcC  |        | Amino acid biosynthesis and metabolism            | 1                                         | 1  | 0.67 | na   |      |
| 1087 | osmotically inducible lipoprotein OsmE                          | osmE  | osmE   |                                                   | Membrane proteins; Adaptation, protection | 7  | 2    | 0.66 | 0.12 |
| 1049 | pyridoxine 5'-phosphate oxidase                                 | pdxH  |        | Biosynthesis of cofactors, prosthetic groups      | 2                                         | 1  | 0.65 | 0.08 |      |
| 5323 | acetylglutamate kinase                                          | argB  |        | Amino acid biosynthesis and metabolism            | 2                                         | 1  | 0.65 | 0.06 |      |
| 432  | S-adenosyl-L-homocysteine hydrolase                             | sahH  | ahcY   |                                                   | Amino acid biosynthesis and metabolism    | 5  | 1    | 0.65 | 0.02 |
| 430  | 5,10-methylenetetrahydrofolate reductase                        | metF  |        | Central intermediary metabolism                   | 10                                        | 2  | 0.64 | 0.08 |      |
| 588  | conserved hypothetical protein                                  | yeaG  |        | Hypothetical, unclassified, unknown               | 27                                        | 5  | 0.64 | 0.10 |      |
| 2424 | probable non-ribosomal peptide synthetase                       |       |        | Adaptation, protection                            | 90                                        | 7  | 0.64 | 0.09 |      |
| 3478 | rhamnosyltransferase chain B                                    | rhIB  |        | Secreted Factors (toxins, enzymes, alginate)      | 4                                         | 1  | 0.64 | 0.10 |      |
| 4464 | nitrogen regulatory IIA protein                                 | ptsN  |        | Transport of small molecules                      | 2                                         | 1  | 0.63 | 0.08 |      |
| 3751 | phosphoribosylglycinamide formyltransferase 2                   | purT  |        | Nucleotide biosynthesis and metabolism            | 1                                         | 1  | 0.62 | na   |      |
| 1484 | probable transcriptional regulator                              |       |        | Transcriptional regulators                        | 1                                         | 1  | 0.60 | na   |      |
| 5291 | probable choline transporter                                    | betT2 |        | Transport of small molecules                      | 1                                         | 1  | 0.60 | na   |      |
| 3348 | probable chemotaxis protein methyltransferase                   | cheR1 |        | Adaptation, protection; Chemotaxis                | 4                                         | 1  | 0.60 | 0.12 |      |
| 744  | probable phenyl-CoA hydratase/isomerase                         |       |        | Putative enzymes                                  | 21                                        | 3  | 0.59 | 0.10 |      |
| 1900 | probable phenazine biosynthesis protein                         | phzB2 |        | Secreted Factors (toxins, enzymes, alginate)      | 8                                         | 2  | 0.59 | 0.06 |      |
| 4025 | probable ethanolamine ammonia-lyase light chain                 | eutC  |        | Carbon compound catabolism                        | 1                                         | 1  | 0.58 | na   |      |
| 5355 | glycolate oxidase subunit GlcD                                  | glcD  |        | Carbon compound catabolism                        | 1                                         | 1  | 0.58 | na   |      |
| 400  | probable cystathionine gamma-lyase                              | metB  | metC   |                                                   | Amino acid biosynthesis and metabolism    | 12 | 1    | 0.57 | 0.04 |
| 35   | tryptophan synthase alpha chain                                 | trpA  |        | Amino acid biosynthesis and metabolism            | 1                                         | 1  | 0.57 | na   |      |
| 407  | glutathione synthetase                                          | gshB  |        | Biosynthesis of cofactors, prosthetic groups      | 1                                         | 1  | 0.57 | na   |      |

5415

and 4211

|      |                                                            |       |                                                |    |   |      |      |         |
|------|------------------------------------------------------------|-------|------------------------------------------------|----|---|------|------|---------|
| 4715 | probable aminotransferase                                  | yfdZ  | Putative enzymes                               | 3  | 1 | 0.57 | 0.06 |         |
| 1529 | DNA ligase                                                 | lig   | dnaL ligA                                      | 1  | 1 | 0.56 | na   |         |
| 1155 | ribonucleoside reductase, small chain                      | nrdB  | Nucleotide biosynthesis and metabolism         | 6  | 1 | 0.55 | 0.04 |         |
| 5316 | 50S ribosomal protein L28                                  | rpmB  | Translation                                    | 12 | 1 | 0.55 | 0.08 |         |
| 745  | probable enoyl-CoA hydratase/isomerase                     |       | Putative enzymes                               | 5  | 2 | 0.55 | 0.04 |         |
| 5092 | imidazolone-5-propionate hydrolase HutI                    | hutI  | Amino acid biosynthesis and metabolism         | 1  | 1 | 0.55 | na   |         |
| 746  | probable acyl-CoA dehydrogenase                            |       | Putative enzymes                               | 7  | 3 | 0.55 | 0.08 |         |
| 1904 | probable phenazine biosynthesis protein                    | phzF2 | Secreted Factors (toxins, enzymes, alginate)   | 2  | 1 | 0.54 | 0.01 | 4215    |
| 5359 | hypothetical protein                                       |       | Hypothetical, unclassified, unknown            | 9  | 1 | 0.54 | 0.04 |         |
| 4588 | glutamate dehydrogenase                                    | gdhA  | Amino acid biosynthesis and metabolism         | 1  | 1 | 0.53 | na   |         |
| 1238 | probable outer membrane component of multidrug efflux pump | opmJ  | Transport of small molecules                   | 1  | 1 | 0.52 | na   |         |
| 2413 | probable class III aminotransferase                        |       | Putative enzymes                               | 93 | 3 | 0.52 | 0.13 |         |
| 4225 | pyochelin synthetase                                       | pchF  | Transport of small molecules; Secreted Factors | 4  | 3 | 0.51 | 0.07 |         |
| 3049 | ribosome modulation factor                                 | rnf   | Translation                                    | 2  | 1 | 0.51 | 0.32 |         |
| 792  | propionate catabolic protein PrpD                          | prpD  | Carbon compound catabolism                     | 43 | 4 | 0.50 | 0.06 |         |
| 888  | arginine/ornithine binding protein AotJ                    | aotJ  | Transport of small molecules                   | 1  | 1 | 0.50 | na   |         |
| 2764 | hypothetical protein                                       |       | Hypothetical, unclassified, unknown            | 1  | 1 | 0.49 | na   |         |
| 3569 | 3-hydroxyisobutyrate dehydrogenase                         | mmsB  | Carbon compound catabolism                     | 16 | 1 | 0.48 | 0.02 |         |
| 39   | hypothetical protein                                       |       | Hypothetical, unclassified, unknown            | 38 | 1 | 0.48 | 0.10 |         |
| 2290 | glucose dehydrogenase                                      | gcd   | Carbon compound catabolism                     | 8  | 2 | 0.48 | 0.08 |         |
| 3083 | aminopeptidase N                                           | pepN  | Translation                                    | 3  | 1 | 0.48 | 0.07 |         |
| 4607 | hypothetical protein                                       |       | Hypothetical, unclassified, unknown            | 16 | 1 | 0.48 | 0.07 |         |
| 399  | cystathionine beta-synthase                                |       | Amino acid biosynthesis and metabolism         | 6  | 1 | 0.47 | 0.06 |         |
| 3570 | methylmalonate-semialdehyde dehydrogenase                  | mmsA  | Amino acid biosynthesis and metabolism         | 4  | 1 | 0.47 | 0.05 |         |
| 5091 | N-formylglutamate amidohydrolase                           | hutG  | Amino acid biosynthesis and metabolism         | 4  | 1 | 0.46 | 0.07 |         |
| 4231 | salicylate biosynthesis isochorismate synthase             | pchA  | Secreted Factors                               | 1  | 1 | 0.45 | na   |         |
| 408  | twitching motility protein PilG                            | pilG  | Chemotaxis                                     | 1  | 1 | 0.44 | na   |         |
| 4847 | biotin carboxyl carrier protein (BCCP)                     | accB  | Fatty acid and phospholipid metabolism         | 11 | 1 | 0.43 | 0.04 |         |
| 2394 | probable aminotransferase                                  | fabE  | Putative enzymes                               | 2  | 1 | 0.43 | 0.16 |         |
| 554  | hypothetical protein                                       |       | Hypothetical, unclassified, unknown            | 1  | 1 | 0.42 | na   |         |
| 122  | conserved hypothetical protein                             |       | Hypothetical, unclassified, unknown            | 6  | 2 | 0.42 | 0.08 |         |
| 1899 | probable phenazine biosynthesis protein                    | phzA2 | Secreted Factors (toxins, enzymes, alginate)   | 2  | 2 | 0.37 | 0.00 | or 4210 |
| 3792 | 2-isopropylmalate synthase                                 | leuA  | Amino acid biosynthesis and metabolism         | 9  | 2 | 0.36 | 0.11 |         |
| 2395 | hypothetical protein                                       |       | Hypothetical, unclassified, unknown            | 4  | 1 | 0.33 | 0.07 |         |
| 4385 | GroEL protein                                              | groEL | Chaperones & heat shock proteins               | 3  | 1 | 0.33 | 0.07 |         |
| 2367 | hypothetical protein                                       | mopA  | Hypothetical, unclassified, unknown            | 4  | 1 | 0.30 | 0.05 |         |
| 1803 | Lon protease                                               | lon   | deg                                            | 1  | 1 | 0.29 | na   |         |
| 3120 | 3-isopropylmalate dehydratase small subunit                | leuD  | Amino acid biosynthesis and metabolism         | 1  | 1 | 0.28 | na   |         |
| 364  | probable oxidoreductase                                    |       | Putative enzymes                               | 1  | 1 | 0.26 | na   |         |
| 4228 | pyochelin biosynthesis protein PchD                        | pchD  | Secreted Factors (toxins, enzymes, alginate)   | 30 | 5 | 0.25 | 0.05 |         |
| 4226 | dihydroaeruginic acid synthetase                           | pchE  | Secreted Factors (toxins, enzymes, alginate)   | 15 | 3 | 0.24 | 0.04 |         |
| 4230 | salicylate biosynthesis protein PchB                       | pchB  | Secreted Factors (toxins, enzymes, alginate)   | 17 | 2 | 0.23 | 0.08 |         |
| 4224 | hypothetical protein                                       | pchG  | Hypothetical, unclassified, unknown            | 21 | 2 | 0.19 | 0.05 |         |
| 2222 | hypothetical protein                                       |       | Hypothetical, unclassified, unknown            | 1  | 1 | 0.08 | na   |         |

PA#, *P. aeruginosa* gene number; alt gene, alternative gene name; *n*, number of independent identifications and quantification events for each protein; u-ICAT, number of unique peptide sequences; fold induction, average ratios of all quantified peptides for each protein representing relative increase in protein abundance during growth of *P. aeruginosa* in 8  $\mu\text{M}$   $\text{Mg}^{2+}$ ; na, not applicable; alt ORF, identified peptides are identical in both ORFs. Values >1.5 represent increased relative abundance on growth in low magnesium, values <0.66 represent decreased relative abundance.
