# Supplementary material
Source: PubMed Central journal article supplement (PMC151416)
Supplement: pnas_0435846100_5.pdf [file pnas_0435846100_5.pdf]

**Table 6. Results of *P. aeruginosa* membrane fraction ICAT analysis**

| PA#  | Protein name                                                          | Gene  | Alt gene    | Function                                      | n  | u-ICAT | Fold induction | SD   | Alt ORF    |
|------|-----------------------------------------------------------------------|-------|-------------|-----------------------------------------------|----|--------|----------------|------|------------|
| 4635 | conserved hypothetical protein                                        |       | mgtC        | Hypothetical, unclassified, unknown           | 2  | 1      | 20.50          | 9.50 |            |
| 4825 | Mg(2+) transport ATPase, P-type 2                                     | mgtA  |             | Transport of small molecules                  | 63 | 3      | 8.11           | 3.32 |            |
| 3553 | probable glycosyl transferase                                         |       | pmrF        | Adaptation, protection; Putative enzymes      | 4  | 2      | 6.58           | 0.43 |            |
| 1941 | hypothetical protein                                                  |       |             | Hypothetical, unclassified, unknown           | 1  | 1      | 6.25           | na   |            |
| 2137 | hypothetical protein                                                  |       |             | Hypothetical, unclassified, unknown           | 1  | 1      | 5.00           | na   |            |
| 1432 | autoinducer synthesis protein LasI                                    | lasI  |             | Adaptation, protection                        | 2  | 1      | 4.77           | 0.32 |            |
| 4824 | hypothetical protein                                                  |       |             | Hypothetical, unclassified, unknown           | 4  | 2      | 4.17           | 0.14 |            |
| 1770 | phosphoenolpyruvate synthase                                          | ppsA  |             | Carbon compound catabolism                    | 6  | 1      | 3.41           | 1.07 |            |
| 1179 | two-component response regulator PhoP                                 | phoP  |             | Transcriptional regulators                    | 2  | 1      | 3.28           | 0.60 |            |
| 4456 | probable ATP-binding component of ABC transporter                     |       | yrbF        | Transport of small molecules                  | 3  | 2      | 3.15           | 0.32 |            |
| 126  | hypothetical protein                                                  |       |             | Hypothetical, unclassified, unknown           | 2  | 1      | 3.03           | 0.13 |            |
| 1585 | 2-oxoglutarate dehydrogenase (E1 subunit)                             | sucA  |             | Amino acid biosynthesis and metabolism        | 10 | 3      | 2.97           | 0.59 |            |
| 4666 | glutamyl-tRNA reductase                                               | hemA  | hem1; glutR | Amino acid biosynthesis and metabolism        | 2  | 1      | 2.71           | 0.21 |            |
| 2540 | conserved hypothetical protein                                        |       |             | Hypothetical, unclassified, unknown           | 3  | 1      | 2.69           | 0.18 |            |
| 2789 | hypothetical protein                                                  |       |             | Hypothetical, unclassified, unknown           | 1  | 1      | 2.50           | na   |            |
| 4241 | 30S ribosomal protein S13                                             | rpsM  |             | Translation                                   | 5  | 1      | 2.42           | 0.05 |            |
| 4266 | elongation factor G                                                   | fusA1 |             | Translation                                   | 9  | 1      | 2.41           | 0.22 |            |
| 603  | probable ATP-binding component of ABC transporter                     |       |             | Transport of small molecules                  | 1  | 1      | 2.38           | na   |            |
| 4656 | conserved hypothetical protein                                        |       |             | Hypothetical, unclassified, unknown           | 3  | 1      | 2.26           | 0.45 |            |
| 1583 | succinate dehydrogenase (A subunit)                                   | sdhA  |             | Energy metabolism                             | 3  | 2      | 2.24           | 0.40 |            |
| 1584 | succinate dehydrogenase (B subunit)                                   | sdhB  |             | Energy metabolism                             | 7  | 3      | 2.20           | 0.28 |            |
| 4239 | 30S ribosomal protein S4                                              | rpsD  |             | Translation                                   | 9  | 2      | 2.19           | 0.22 |            |
| 2953 | electron transfer flavoprotein-ubiquinone oxidoreductase              |       |             | Energy metabolism                             | 9  | 1      | 2.19           | 0.31 |            |
| 4246 | 30S ribosomal protein S5                                              | rpsE  |             | Translation                                   | 6  | 1      | 2.18           | 0.24 |            |
| 5300 | cytochrome c5                                                         | cycB  |             | Energy metabolism                             | 5  | 1      | 2.18           | 0.17 |            |
| 2071 | elongation factor G                                                   | fusA2 |             | Translation                                   | 2  | 1      | 2.17           | 0.30 |            |
| 1459 | probable methyltransferase                                            |       | cheB        | Chemotaxis                                    | 1  | 1      | 2.16           | 0.90 |            |
| 5557 | ATP synthase delta chain                                              | atpH  | uncH papE   | Energy metabolism                             | 5  | 1      | 2.15           | 0.08 |            |
| 4670 | ribose-phosphate pyrophosphokinase                                    | prs   | prsA        | Carbon compound catabolism                    | 23 | 2      | 2.13           | 0.22 |            |
| 3068 | conserved hypothetical protein                                        |       |             | Hypothetical, unclassified, unknown           | 1  | 1      | 2.13           | na   |            |
| 3666 | tetrahydrodipicolinate succinylase                                    | dapD  |             | Cell wall / LPS / capsule                     | 1  | 1      | 2.10           | na   |            |
| 3656 | 30S ribosomal protein S2                                              | rpsB  |             | Translation                                   | 6  | 1      | 2.01           | 0.32 |            |
| 5556 | ATP synthase alpha chain                                              | atpA  | uncA papA   | Energy metabolism                             | 4  | 1      | 2.00           | 0.32 |            |
| 3716 | hypothetical protein                                                  |       |             | Hypothetical, unclassified, unknown           | 5  | 1      | 2.00           | 0.17 |            |
| 5555 | ATP synthase gamma chain                                              | atpG  | uncG papC   | Energy metabolism                             | 2  | 1      | 1.98           | 0.03 |            |
| 4756 | carbamoylphosphate synthetase large subunit                           | carB  |             | Nucleotide biosynthesis and metabolism        | 3  | 1      | 1.90           | 0.41 |            |
| 4005 | conserved hypothetical protein                                        |       | ybeB        | Hypothetical, unclassified, unknown           | 2  | 1      | 1.83           | 0.24 |            |
| 2302 | probable non-ribosomal peptide synthetase                             |       |             | Putative enzymes                              | 7  | 2      | 1.83           | 0.23 |            |
| 892  | arginine/ornithine transport protein AotP                             | aotP  |             | Transport of small molecules                  | 6  | 1      | 1.82           | 0.22 |            |
| 1504 | probable transcriptional regulator                                    |       |             | Transcriptional regulators                    | 1  | 1      | 1.82           | na   |            |
| 3481 | conserved hypothetical protein                                        |       | mrp         | Hypothetical, unclassified, unknown           | 5  | 1      | 1.82           | 0.04 |            |
| 4260 | 50S ribosomal protein L2                                              | rplB  |             | Translation                                   | 1  | 1      | 1.80           | na   |            |
| 2247 | 2-oxoisovalerate dehydrogenase (alpha subunit)                        | bkdA1 |             | Amino acid biosynthesis and metabolism        | 3  | 1      | 1.79           | 0.24 |            |
| 1262 | probable MFS transporter                                              |       |             | Membrane proteins                             | 1  | 1      | 1.74           | na   |            |
| 4935 | 30S ribosomal protein S6                                              | rpsF  |             | Translation                                   | 12 | 1      | 1.74           | 0.20 |            |
| 5554 | ATP synthase beta chain                                               | atpD  | uncD papB   | Energy metabolism                             | 4  | 1      | 1.74           | 0.18 |            |
| 2976 | ribonuclease E                                                        | rne   | ams         | Transcription, RNA processing and degradation | 8  | 1      | 1.72           | 0.22 |            |
| 85   | conserved hypothetical protein                                        |       |             | Hypothetical, unclassified, unknown           | 2  | 1      | 1.71           | 0.02 |            |
| 998  | hypothetical protein                                                  |       |             | Putative enzymes                              | 7  | 1      | 1.68           | 0.28 |            |
| 302  | polyamine transport protein PotG                                      | potG  |             | Transport of small molecules                  | 8  | 1      | 1.68           | 0.22 |            |
| 70   | hypothetical protein                                                  |       |             | Hypothetical, unclassified, unknown           | 14 | 4      | 1.67           | 0.20 |            |
| 4053 | 6,7-dimethyl-8-ribitylumazine synthase                                | ribE  | ribH        | Biosynthesis of cofactors                     | 5  | 1      | 1.66           | 0.19 |            |
| 3263 | conserved hypothetical protein                                        |       | yaiD        | Hypothetical, unclassified, unknown           | 3  | 1      | 1.66           | 0.10 |            |
| 2991 | soluble pyridine nucleotide transhydrogenase                          | sth   |             | Nucleotide biosynthesis and metabolism        | 1  | 1      | 1.64           | na   |            |
| 5108 | hypothetical protein                                                  |       |             | Hypothetical, unclassified, unknown           | 1  | 1      | 1.64           | na   |            |
| 4408 | cell division protein FtsA                                            | ftsA  |             | Cell division                                 | 6  | 1      | 1.63           | 0.20 |            |
| 3831 | leucine aminopeptidase                                                | pepA  | phpA        | Translation, post-translational modification  | 6  | 3      | 1.61           | 0.41 |            |
| 4407 | cell division protein FtsZ                                            | ftsZ  |             | Cell division                                 | 1  | 1      | 1.59           | na   |            |
| 5307 | hypothetical protein                                                  |       |             | Hypothetical, unclassified, unknown           | 1  | 1      | 1.59           | na   |            |
| 2014 | probable acyl-CoA carboxyltransferase beta chain                      |       |             | Putative enzymes                              | 3  | 1      | 1.59           | 0.43 |            |
| 4254 | 30S ribosomal protein S17                                             | rpsQ  |             | Translation, post-translational modification  | 4  | 1      | 1.58           | 0.07 |            |
| 4760 | DnaJ protein                                                          | dnaJ  |             | Adaptation, protection; Chaperones            | 2  | 1      | 1.56           | 0.32 |            |
| 3328 | probable FAD-dependent monooxygenase                                  |       |             | Putative enzymes                              | 2  | 1      | 1.56           | 0.63 |            |
| 2641 | NADH dehydrogenase I chain F                                          | nuoF  |             | Energy metabolism                             | 4  | 2      | 1.55           | 0.13 |            |
| 4270 | DNA-directed RNA polymerase beta chain                                | rpoB  |             | Transcription, RNA processing and degradation | 4  | 2      | 1.54           | 0.25 |            |
| 4268 | 30S ribosomal protein S12                                             | rpsL  | str         | Translation, post-translational modification  | 18 | 2      | 1.54           | 0.13 |            |
| 5316 | 50S ribosomal protein L28                                             | rplM  |             | Translation, post-translational modification  | 5  | 1      | 1.54           | 0.08 |            |
| 2776 | conserved hypothetical protein                                        |       | ordL        | Hypothetical, unclassified, unknown           | 1  | 1      | 1.53           | na   |            |
| 4429 | probable cytochrome c1 precursor                                      |       |             | Energy metabolism                             | 1  | 1      | 1.52           | na   |            |
| 4431 | probable iron-sulfur protein                                          |       |             | Putative enzymes                              | 1  | 1      | 1.52           | na   |            |
| 2248 | 2-oxoisovalerate dehydrogenase (beta subunit)                         | bkdA2 |             | Amino acid biosynthesis and metabolism        | 2  | 1      | 1.48           | 0.02 |            |
| 715  | hypothetical protein                                                  |       |             | Related to phage, transposon, or plasmid      | 1  | 1      | 1.47           | na   |            |
| 936  | hypothetical protein                                                  |       |             | Hypothetical, unclassified, unknown           | 3  | 1      | 1.45           | 0.00 |            |
| 3465 | conserved hypothetical protein                                        |       | yfiS        | Hypothetical, unclassified, unknown           | 3  | 1      | 1.43           | 0.21 |            |
| 1889 | hypothetical protein                                                  |       |             | Hypothetical, unclassified, unknown           | 1  | 1      | 1.43           | na   |            |
| 5146 | hypothetical protein                                                  |       |             | Hypothetical, unclassified, unknown           | 1  | 1      | 1.43           | na   |            |
| 4307 | chemotactic transducer PctC                                           | pctC  |             | Adaptation, protection; Chemotaxis            | 6  | 2      | 1.42           | 0.14 | 4309, 4310 |
| 1064 | hypothetical protein                                                  |       |             | Hypothetical, unclassified, unknown           | 7  | 2      | 1.42           | 0.19 |            |
| 3694 | hypothetical protein                                                  |       |             | Hypothetical, unclassified, unknown           | 3  | 1      | 1.38           | 0.08 |            |
| 652  | transcriptional regulator Vfr                                         | vfr   |             | Transcriptional regulators                    | 6  | 1      | 1.36           | 0.10 |            |
| 782  | proline dehydrogenase PutA                                            | putA  | pruA; pruB  | Amino acid biosynthesis and metabolism        | 4  | 2      | 1.34           | 0.12 |            |
| 1072 | branched-chain amino acid transport protein BraE                      | braE  |             | Membrane proteins; Transport                  | 1  | 1      | 1.33           | na   |            |
| 4957 | phosphatidylserine decarboxylase                                      | psd   |             | Amino acid biosynthesis and metabolism        | 2  | 1      | 1.32           | 0.05 |            |
| 4054 | GTP cyclohydrolase II / 3,4-dihydroxy-2-butanone 4-phosphate synthase | ribB  | ribA        | Biosynthesis of cofactors, prosthetic groups  | 1  | 1      | 1.30           | na   |            |
| 3999 | D-ala-D-ala-carboxypeptidase                                          | dacC  | dacD        | Cell wall / LPS / capsule                     | 10 | 1      | 1.30           | 0.06 |            |
| 2994 | Na+-translocating NADH:quinone oxidoreductase, subunit Nqr6           | nqrF  |             | Energy metabolism                             | 3  | 1      | 1.30           | 0.08 |            |
| 1482 | cytochrome C-type biogenesis protein CcmH                             | ccmH  | ccl2 cycL   | Energy metabolism                             | 4  | 1      | 1.30           | 0.15 |            |
| 4265 | elongation factor Tu                                                  | tufA  |             | Translation, post-translational modification  | 9  | 3      | 1.29           | 0.16 | 4277       |
| 2232 | probable phosphomannose isomerase/GDP-mannose pyrophosphorylase       |       |             | Cell wall / LPS / capsule                     | 10 | 2      | 1.27           | 0.15 |            |
| 4    | DNA gyrase subunit B                                                  | gyrB  |             | DNA replication, recombination, modification  | 8  | 1      | 1.26           | 0.10 |            |
| 3611 | hypothetical protein                                                  |       |             | Hypothetical, unclassified, unknown           | 3  | 1      | 1.26           | 0.15 |            |
| 4525 | type 4 fimbrial precursor PilA                                        | pilA  |             | Motility & Attachment                         | 4  | 2      | 1.26           | 0.05 |            |
| 1587 | lipamide dehydrogenase-glc                                            | lpdG  | lpdA        | Amino acid biosynthesis and metabolism        | 10 | 2      | 1.23           | 0.44 |            |
| 1339 | probable ATP-binding component of ABC transporter                     |       |             | Transport of small molecules                  | 4  | 2      | 1.22           | 0.07 |            |
| 3247 | hypothetical protein                                                  |       |             | Hypothetical, unclassified, unknown           | 3  | 1      | 1.20           | 0.16 |            |
| 3349 | probable chemotaxis protein                                           |       |             | Adaptation, protection; Chemotaxis            | 3  | 1      | 1.20           | 0.02 |            |
| 867  | hypothetical protein                                                  |       |             | Hypothetical, unclassified, unknown           | 13 | 2      | 1.19           | 0.06 |            |
| 1475 | heme exporter protein CcmA                                            | ccmA  | cycV, helA  | Transport of small molecules                  | 1  | 1      | 1.18           | na   |            |
| 1814 | hypothetical protein                                                  |       |             | Hypothetical, unclassified, unknown           | 2  | 1      | 1.17           | 0.07 |            |
| 3150 | LPS biosynthesis protein WbpG                                         | wbpG  |             | Cell wall / LPS / capsule                     | 1  | 1      | 1.14           | na   |            |
| 3584 | glycerol-3-phosphate dehydrogenase                                    | glpD  |             | Central intermediary metabolism               | 11 | 2      | 1.13           | 0.14 |            |
| 5011 | heptosyltransferase I                                                 | wacC  | rfaC        | Cell wall / LPS / capsule                     | 3  | 1      | 1.12           | 0.04 |            |
| 11   | probable 2-OH-lauroyltransferase                                      |       |             | Cell wall / LPS / capsule                     | 2  | 1      | 1.11           | 0.09 |            |

|      |                                                           |       |       |                                                |    |    |      |              |
|------|-----------------------------------------------------------|-------|-------|------------------------------------------------|----|----|------|--------------|
| 4717 | conserved hypothetical protein                            |       |       | Hypothetical, unclassified, unknown            | 2  | 1  | 1.11 | 0.05         |
| 2725 | probable chaperone                                        |       |       | Chaperones & heat shock proteins; Translation  | 1  | 1  | 1.11 | na           |
| 5152 | probable ATP-binding component of ABC transporter         |       |       | Transport of small molecules                   | 1  | 1  | 1.11 | na           |
| 2945 | conserved hypothetical protein                            |       | cobW  | Biosynthesis of cofactors                      | 1  | 1  | 1.10 | na           |
| 5119 | glutamine synthetase                                      | glnA  |       | Amino acid biosynthesis and metabolism         | 11 | 1  | 1.10 | 0.14         |
| 3582 | glycerol kinase                                           | glpK  |       | Central intermediary metabolism                | 2  | 2  | 1.09 | 0.17         |
| 1057 | conserved hypothetical protein                            |       | phaE  | Hypothetical, unclassified, unknown            | 2  | 1  | 1.08 | 0.16         |
| 5049 | 50S ribosomal protein L31                                 | rpmE  |       | Translation, post-translational modification   | 1  | 1  | 1.08 | na           |
| 2402 | probable non-ribosomal peptide synthetase                 |       |       | Putative enzymes                               | 19 | 7  | 1.06 | 0.23         |
| 4874 | conserved hypothetical protein                            |       | psIF  | Hypothetical, unclassified, unknown            | 3  | 1  | 1.06 | 0.01         |
| 4633 | probable chemotaxis transducer                            |       |       | Adaptation, protection; Chemotaxis             | 4  | 1  | 1.05 | 0.03         |
| 2042 | probable transporter (membrane subunit)                   |       | ygjU  | Transport of small molecules                   | 5  | 2  | 1.04 | 0.07         |
| 2195 | hydrogen cyanide synthase HcnC                            | hcnC  |       | Central intermediary metabolism                | 1  | 1  | 1.04 | na           |
| 4565 | glutamate 5-kinase                                        | proB  |       | Amino acid biosynthesis and metabolism         | 1  | 1  | 1.02 | na           |
| 917  | potassium uptake protein Kup                              | kup   |       | Transport of small molecules                   | 4  | 1  | 1.02 | 0.08         |
| 172  | hypothetical protein                                      |       |       | Hypothetical, unclassified, unknown            | 2  | 1  | 1.01 | 0.08         |
| 5304 | D-amino acid dehydrogenase, small subunit                 | dadA  |       | Amino acid biosynthesis and metabolism         | 12 | 1  | 1.00 | 0.21         |
| 2386 | L-ornithine N5-oxygenase                                  | pvdA  |       | Adaptation, protection                         | 2  | 1  | 1.00 | 0.04         |
| 4751 | cell division protein FtsH                                | ftsH  | hflB  | Fatty acid and phospholipid metabolism         | 1  | 1  | 0.98 | na           |
| 1969 | hypothetical protein                                      |       |       | Hypothetical, unclassified, unknown            | 4  | 1  | 0.96 | 0.15         |
| 2399 | pyoverdine synthetase D                                   | pvdD  |       | Adaptation, protection; Secreted Factors       | 4  | 1  | 0.95 | 0.09         |
| 5028 | conserved hypothetical protein                            |       |       | Hypothetical, unclassified, unknown            | 4  | 2  | 0.92 | 0.05         |
| 2728 | hypothetical protein                                      |       |       | Hypothetical, unclassified, unknown            | 1  | 1  | 0.89 | na           |
| 4372 | hypothetical protein                                      |       |       | Hypothetical, unclassified, unknown            | 1  | 1  | 0.89 | na           |
| 4578 | hypothetical protein                                      |       |       | Hypothetical, unclassified, unknown            | 1  | 1  | 0.89 | na           |
| 1222 | probable membrane-bound lytic murein transglycosylase A   | mltA  |       | Cell wall / LPS / capsule                      | 1  | 1  | 0.88 | na           |
| 2345 | conserved hypothetical protein                            |       |       | Hypothetical, unclassified, unknown            | 9  | 2  | 0.87 | 0.15         |
| 1944 | hypothetical protein                                      |       |       | Hypothetical, unclassified, unknown            | 3  | 2  | 0.87 | 0.02         |
| 4385 | GroEL protein                                             | groEL | mopA  | Chaperones & heat shock proteins               | 3  | 1  | 0.86 | 0.02         |
| 2424 | probable non-ribosomal peptide synthetase                 |       |       | Adaptation, protection                         | 40 | 11 | 0.86 | 0.14         |
| 2413 | probable class III aminotransferase                       |       |       | Putative enzymes                               | 7  | 2  | 0.84 | 0.18         |
| 5172 | ornithine carbamoyltransferase, catabolic                 | arcB  |       | Amino acid biosynthesis and metabolism         | 9  | 1  | 0.84 | 0.21         |
| 1641 | hypothetical protein                                      |       |       | Hypothetical, unclassified, unknown            | 1  | 1  | 0.81 | na           |
| 3617 | RecA protein                                              | recA  |       | DNA replication, recombination, modification   | 5  | 1  | 0.80 | 0.03         |
| 4168 | probable TonB-dependent receptor                          |       |       | Transport of small molecules                   | 1  | 1  | 0.80 | na           |
| 5308 | leucine-responsive regulatory protein                     | lrp   |       | Central intermediary metabolism                | 1  | 1  | 0.80 | na           |
| 4744 | translation initiation factor IF-2                        | infB  |       | Translation, post-translational modification   | 1  | 1  | 0.77 | na           |
| 3158 | probable oxidoreductase WpbB                              | wpbB  |       | Cell wall / LPS / capsule; Putative enzymes    | 3  | 1  | 0.73 | 0.06         |
| 5015 | pyruvate dehydrogenase                                    | aceE  | aceA  | Amino acid biosynthesis and metabolism         | 5  | 2  | 0.73 | 0.03         |
| 1860 | hypothetical protein                                      |       |       | Putative enzymes                               | 2  | 1  | 0.72 | 0.00         |
| 3179 | conserved hypothetical protein                            |       | yciL  | Hypothetical, unclassified, unknown            | 3  | 1  | 0.70 | 0.05         |
| 4916 | hypothetical protein                                      |       |       | Hypothetical, unclassified, unknown            | 1  | 1  | 0.68 | na           |
| 3148 | probable UDP-N-acetylglucosamine 2-epimerase Wbpl         | wbpl  |       | Cell wall / LPS / capsule; Putative enzymes    | 3  | 1  | 0.66 | 0.04         |
| 4694 | ketol-acid reductoisomerase                               | ilvC  |       | Amino acid biosynthesis and metabolism         | 2  | 2  | 0.63 | 0.10         |
| 4876 | osmotically inducible lipoprotein OsmE                    | osmE  | osmE  | Membrane proteins; Adaptation, protection      | 3  | 1  | 0.60 | 0.05         |
| 4579 | hypothetical protein                                      |       |       | Hypothetical, unclassified, unknown            | 1  | 1  | 0.59 | na           |
| 2290 | glucose dehydrogenase                                     | gcd   |       | Carbon compound catabolism                     | 3  | 1  | 0.56 | 0.03         |
| 4226 | dihydroaeruginic acid synthetase                          | pchE  |       | Transport of small molecules; Secreted Factors | 9  | 3  | 0.56 | 0.05         |
| 3331 | cytochrome P450                                           |       |       | Adaptation, protection                         | 5  | 1  | 0.50 | 0.04         |
| 4230 | salicylate biosynthesis protein PchB                      | pchB  |       | Transport of small molecules; Secreted Factors | 3  | 1  | 0.48 | 0.04         |
| 4224 | hypothetical protein                                      |       | pchG  | Hypothetical, unclassified, unknown            | 2  | 1  | 0.45 | 0.07         |
| 139  | alkyl hydroperoxide reductase subunit C                   | ahpC  |       | Adaptation, protection                         | 7  | 1  | 0.45 | 0.04         |
| 4228 | pyochelin biosynthesis protein PchD                       | pchD  |       | Transport of small molecules; Secreted Factors | 2  | 1  | 0.44 | 0.00         |
| 4607 | hypothetical protein                                      |       |       | Hypothetical, unclassified, unknown            | 6  | 1  | 0.44 | 0.09         |
| 5436 | probable biotin carboxylase subunit of a transcarboxylase |       |       | Central intermediary metabolism                | 1  | 1  | 0.40 | na           |
| 1903 | phenazine biosynthesis protein PhzE                       |       | phzE2 | Secreted Factors (toxins, enzymes, alginate)   | 1  | 1  | 0.37 | na or 4214   |
| 4231 | salicylate biosynthesis isochorismate synthase            |       | pchA  | Secreted Factors (toxins, enzymes, alginate)   | 2  | 1  | 0.36 | 0.06         |
| 1899 | probable phenazine biosynthesis protein                   |       | phzA2 | Secreted Factors (toxins, enzymes, alginate)   | 3  | 1  | 0.34 | 0.02 or 4210 |
| 4988 | 3-deoxy-D-manno-octulosonic-acid (KDO) transferase        | waaA  | kdtA  | Cell wall / LPS / capsule                      | 1  | 1  | 0.22 | na           |
| 2069 | probable carbamoyl transferase                            |       |       | Putative enzymes                               | 3  | 1  | 0.11 | 0.02         |

PA#, *P. aeruginosa* gene number; alt gene, alternative gene name; *n*, number of independent identifications and quantification events for each protein; u-ICAT, number of unique peptide sequences; fold induction, average ratios of all quantified peptides for each protein representing relative increase in protein abundance during growth of *P. aeruginosa* in 8  $\mu\text{M}$   $\text{Mg}^{2+}$ ; na, not applicable; alt ORF, identified peptides are identical in both ORFs. Values >1.5 represent increased relative abundance upon growth in low magnesium, values <0.66 represent decreased relative abundance.
