# Supplementary material
Source: PubMed Central journal article supplement (PMC151416)
Supplement: pnas_0435846100_6.pdf [file pnas_0435846100_6.pdf]

**Table 7. *P. aeruginosa* stress-response proteins not induced by magnesium limitation**

| PA#  | Protein name                                   | Gene | Alt gene | Function                                     | n  | u-ICAT | Fold induction | SD   | Alt ORF |
|------|------------------------------------------------|------|----------|----------------------------------------------|----|--------|----------------|------|---------|
| 4236 | catalase                                       | katA | catA     | Adaptation, protection                       | 5  | 1      | 1.25           | 0.04 |         |
| 4542 | CipB protein                                   | cipB |          | Translation                                  | 5  | 1      | 1.19           | 0.16 |         |
| 1801 | ATP-dependent Clp protease proteolytic subunit | cipP |          | Chaperones & heat shock proteins             | 8  | 1      | 0.92           | 0.08 |         |
| 2620 | ATP-binding protease component ClpA            | cipA |          | Translation                                  | 1  | 1      | 1.35           | na   |         |
| 4760 | DnaJ protein                                   | dnaJ |          | Adaptation, protection; Chaperones           | 13 | 1      | 1.19           | 0.08 |         |
| 2399 | pyoverdine synthetase D                        | pvdD |          | Adaptation, protection; Secreted Factors     | 4  | 1      | 0.78           | 0.25 |         |
| 2386 | L-ornithine N5-oxygenase                       | pvdA |          | Adaptation, protection                       | 2  | 1      | 1.00           | 0.04 |         |
| 4231 | salicylate biosynthesis isochorismate synthase | pchA |          | Secreted Factors                             | 1  | 1      | 0.45           | na   |         |
| 4228 | pyochelin biosynthesis protein PchD            | pchD |          | Secreted Factors (toxins, enzymes, alginate) | 30 | 5      | 0.25           | 0.05 |         |
| 4226 | dihydroaeruginic acid synthetase               | pchE |          | Secreted Factors (toxins, enzymes, alginate) | 15 | 3      | 0.24           | 0.04 |         |
| 4230 | salicylate biosynthesis protein PchB           | pchB |          | Secreted Factors (toxins, enzymes, alginate) | 17 | 2      | 0.23           | 0.08 |         |
| 4224 | hypothetical protein                           |      | pchG     | Hypothetical, unclassified, unknown          | 21 | 2      | 0.19           | 0.05 |         |

PA#, *P. aeruginosa* gene number; alt gene, alternative gene name; *n*, number of independent identifications and quantification events for each protein; u-ICAT, number of unique peptide sequences; fold induction, average ratios of all quantified peptides for each protein representing relative increase in protein abundance during growth of *P. aeruginosa* in 8  $\mu\text{M}$   $\text{Mg}^{2+}$ ; na, not applicable; alt ORF, identified peptides are identical in both ORFs. Values >1.5 represent increased relative abundance upon growth in low magnesium; values <0.66 represent decreased relative abundance.
